# Supplementary material for: A Novel DNA Repair Gene Signature for Immune Checkpoint Inhibitor-Based Therapy in Gastric Cancer
Source: Front Cell Dev Biol. 2022 May 23;10:893546. doi: 10.3389/fcell.2022.893546 (PMC9168368; doi:10.3389/fcell.2022.893546)
Supplement: Supplementary file 6 [file Table4.XLSX]

## Sheet: pca_infiltration
Sample_ID	DRGS_score	DRGS_group	CD4_naive	CD8_naive	Cytotoxic	Exhausted	Tr1	nTreg	iTreg	Th1	Th2	Th17	Tfh	Central_memory	Effector_memory	NKT	MAIT	DC	B_cell	Monocyte	Macrophage	NK	Neutrophil	Gamma_delta	CD4_T	CD8_T
TCGA-BR-4294-01A-01R-1131-13	-16.0773	Low score	0.05	0.135	0.16	0.078	0.134	0.129	0.063	0.048	0.309	0.376	0.148	0.06	0	0	0.01	0.036	0.052	0.127	0.141	0.122	0.208	0.116	0.071	0.117
TCGA-BR-6710-01A-11R-1884-13	-15.7729	Low score	0.045	0.154	0.324	0.161	0.114	0.179	0.049	0.078	0.359	0.293	0.321	0.077	0	0.204	0.201	0.122	0.119	0.166	0.058	0.143	0.124	0.178	0.072	0.201
TCGA-RD-A8N2-01A-12R-A36D-31	-15.5552	Low score	0.116	0.206	0.266	0.19	0.284	0.196	0.177	0.03	0.22	0.16	0.299	0.121	0	0.152	0.209	0.1	0.154	0.165	0.08	0.251	0.089	0.101	0.189	0.223
TCGA-BR-A4J9-01A-12R-A251-31	-14.833	Low score	0.105	0.206	0.211	0.233	0.296	0.224	0.187	0.039	0.291	0.123	0.309	0.121	0	0.168	0.163	0.126	0.243	0.124	0.064	0.21	0.094	0.054	0.189	0.19
TCGA-BR-6564-01A-12R-1884-13	-14.8082	Low score	0.067	0.177	0.322	0.2	0.236	0.272	0.181	0.022	0.263	0.159	0.362	0.076	0	0.218	0.241	0.177	0.172	0.161	0.092	0.278	0.038	0.148	0.151	0.249
TCGA-VQ-A94P-01A-13R-A414-31	-14.5925	Low score	0.103	0.237	0.286	0.194	0.238	0.212	0.161	0.05	0.245	0.128	0.329	0.116	0	0.15	0.267	0.14	0.132	0.172	0.08	0.297	0.102	0.16	0.164	0.251
TCGA-BR-8371-01A-11R-2343-13	-14.4947	Low score	0.151	0.164	0.18	0.207	0.305	0.259	0.233	0.049	0.234	0.156	0.287	0.147	0	0.148	0.231	0.091	0.302	0.095	0.054	0.15	0.064	0	0.25	0.217
TCGA-RD-A8N4-01A-21R-A36D-31	-14.2806	Low score	0.094	0.303	0.226	0.226	0.395	0.218	0.224	0.068	0.437	0.074	0.253	0.11	0	0.12	0.265	0.145	0.17	0.124	0.051	0.257	0.062	0.104	0.212	0.244
TCGA-CD-5798-01A-11R-1602-13	-14.1694	Low score	0	0.177	0.295	0.162	0.175	0.23	0.08	0.029	0.249	0.158	0.26	0.021	0	0.173	0.181	0.2	0.133	0.209	0.155	0.228	0.086	0.138	0.016	0.188
TCGA-BR-A4IV-01A-31R-A251-31	-14.1343	Low score	0.099	0.175	0.218	0.135	0.277	0.179	0.167	0.031	0.189	0.182	0.309	0.099	0	0.158	0.169	0.119	0.19	0.177	0.1	0.245	0.123	0.083	0.169	0.178
TCGA-BR-A4J7-01A-31R-A251-31	-13.5539	Low score	0.053	0.219	0.425	0.226	0.303	0.287	0.185	0.032	0.337	0.168	0.438	0.133	0	0.131	0.227	0.185	0.129	0.129	0.068	0.267	0.035	0.265	0.149	0.318
TCGA-D7-A748-01A-12R-A32D-31	-13.5208	Low score	0.015	0.185	0.276	0.191	0.329	0.275	0.192	0.077	0.242	0.152	0.321	0.039	0	0.118	0.196	0.209	0.09	0.174	0.187	0.245	0.166	0.104	0.19	0.188
TCGA-BR-8384-01A-21R-2402-13	-13.4419	Low score	0.085	0.205	0.28	0.214	0.389	0.258	0.235	0.046	0.306	0.139	0.366	0.114	0	0.163	0.237	0.13	0.154	0.141	0.063	0.268	0.08	0.142	0.203	0.264
TCGA-FP-8209-01A-11R-2343-13	-13.2933	Low score	0.106	0.257	0.312	0.203	0.432	0.269	0.274	0	0.315	0.103	0.459	0.115	0	0.163	0.219	0.165	0.228	0.153	0.026	0.29	0.084	0.12	0.245	0.265
TCGA-BR-6563-01A-13R-2055-13	-13.1026	Low score	0.042	0.253	0.402	0.239	0.381	0.285	0.232	0.027	0.351	0.113	0.45	0.081	0	0.247	0.223	0.172	0.176	0.155	0.102	0.264	0.096	0.19	0.207	0.297
TCGA-RD-A7BW-01A-11R-A32D-31	-13.0334	Low score	0.05	0.219	0.456	0.233	0.367	0.252	0.22	0.054	0.374	0.087	0.408	0.104	0	0.119	0.231	0.209	0.111	0.212	0.073	0.351	0.019	0.238	0.211	0.309
TCGA-BR-6457-01A-21R-1802-13	-12.8228	Low score	0.053	0.204	0.326	0.183	0.244	0.31	0.175	0.005	0.31	0.189	0.396	0.073	0	0.226	0.243	0.19	0.195	0.149	0.081	0.299	0.055	0.152	0.17	0.253
TCGA-CD-A489-01A-11R-A24K-31	-12.5618	Low score	0.092	0.21	0.328	0.171	0.269	0.221	0.156	0.019	0.388	0.142	0.358	0.105	0	0.186	0.249	0.172	0.159	0.177	0.072	0.268	0.053	0.13	0.186	0.27
TCGA-BR-A4J6-01A-11R-A251-31	-12.2485	Low score	0.02	0.191	0.247	0.148	0.189	0.202	0.112	0.012	0.258	0.286	0.316	0.116	0	0.186	0.179	0.144	0.141	0.12	0.081	0.181	0.09	0.126	0.168	0.252
TCGA-BR-8592-01A-11R-2402-13	-12.0286	Low score	0.105	0.26	0.208	0.17	0.321	0.183	0.201	0.01	0.227	0.171	0.382	0.109	0.002	0.202	0.274	0.14	0.23	0.178	0.061	0.287	0.129	0.063	0.218	0.221
TCGA-D7-A747-01A-22R-A33Y-31	-11.934	Low score	0.108	0.222	0.324	0.213	0.35	0.255	0.24	0.06	0.308	0.089	0.371	0.108	0	0.186	0.208	0.135	0.215	0.161	0.064	0.25	0.069	0.086	0.216	0.282
TCGA-BR-8682-01A-11R-2402-13	-11.8971	Low score	0.057	0.241	0.302	0.146	0.341	0.213	0.237	0.033	0.125	0.242	0.239	0.082	0	0.249	0.248	0.087	0.139	0.217	0.104	0.242	0.186	0.046	0.163	0.196
TCGA-BR-8364-01A-11R-2343-13	-11.8348	Low score	0.079	0.255	0.352	0.162	0.327	0.161	0.191	0	0.157	0.184	0.408	0.104	0	0.175	0.193	0.174	0.135	0.201	0.075	0.261	0.081	0.153	0.195	0.223
TCGA-BR-7722-01A-31R-2203-13	-11.8147	Low score	0.041	0.134	0.286	0.161	0.243	0.267	0.177	0.066	0.119	0.257	0.331	0.114	0	0.189	0.221	0.125	0.132	0.174	0.145	0.157	0.121	0.083	0.208	0.196
TCGA-CG-4462-01A-01R-1157-13	-11.6698	Low score	0.042	0.179	0.314	0.125	0.347	0.249	0.205	0.039	0.03	0.204	0.312	0.053	0	0.075	0.201	0.162	0.119	0.159	0.136	0.268	0.4	0.055	0.205	0.118
TCGA-IN-8462-01A-11R-2343-13	-11.4561	Low score	0.027	0.131	0.221	0.209	0.242	0.256	0.162	0.096	0.167	0.224	0.178	0.082	0	0.175	0.19	0.119	0.148	0.194	0.108	0.189	0.143	0.11	0.13	0.145
TCGA-CG-5734-01A-11R-1602-13	-11.3866	Low score	0	0.174	0.435	0.259	0.359	0.365	0.198	0.134	0.201	0.17	0.364	0.015	0	0.246	0.222	0.165	0.18	0.189	0.125	0.189	0.163	0.244	0.221	0.192
TCGA-D7-8579-01A-11R-2343-13	-11.2628	Low score	0.056	0.239	0.282	0.13	0.309	0.292	0.203	0.071	0.089	0.169	0.335	0.075	0	0.249	0.206	0.121	0.179	0.183	0.084	0.176	0.22	0.051	0.186	0.182
TCGA-D7-6522-01A-11R-1802-13	-11.2419	Low score	0.038	0.192	0.374	0.26	0.372	0.34	0.242	0.111	0.354	0.124	0.434	0.056	0	0.183	0.205	0.179	0.225	0.181	0.107	0.256	0.039	0.215	0.228	0.27
TCGA-BR-6803-01A-11R-1884-13	-10.882	Low score	0.084	0.205	0.356	0.206	0.269	0.257	0.193	0.009	0.296	0.176	0.43	0.106	0	0.202	0.228	0.163	0.182	0.164	0.074	0.284	0.031	0.196	0.189	0.272
TCGA-CG-5717-01A-11R-1602-13	-10.8738	Low score	0.043	0.19	0.291	0.218	0.382	0.275	0.24	0.065	0.291	0.21	0.299	0.102	0	0.163	0.239	0.131	0.138	0.175	0.082	0.223	0.123	0.174	0.197	0.217
TCGA-D7-8575-01A-11R-2343-13	-10.8673	Low score	0.072	0.193	0.295	0.116	0.346	0.219	0.201	0.02	0.166	0.27	0.293	0.088	0	0.147	0.156	0.178	0.097	0.128	0.17	0.155	0.157	0.007	0.221	0.162
TCGA-BR-4279-01A-01R-1131-13	-10.8441	Low score	0	0.239	0.444	0.197	0.378	0.219	0.191	0.043	0.312	0.115	0.361	0.042	0	0.131	0.197	0.157	0.131	0.215	0.157	0.283	0.147	0.245	0.164	0.243
TCGA-ZA-A8F6-01A-23R-A36D-31	-10.5325	Low score	0.06	0.24	0.26	0.137	0.221	0.224	0.161	0.032	0.083	0.22	0.229	0.051	0	0.261	0.135	0.15	0.132	0.211	0.185	0.216	0.166	0.065	0.165	0.204
TCGA-IN-A6RJ-01A-21R-A33Y-31	-10.5294	Low score	0.036	0.162	0.236	0.153	0.255	0.146	0.14	0.038	0.304	0.185	0.169	0.101	0	0.018	0.111	0.07	0.109	0.105	0.105	0.113	0.148	0.138	0.073	0.162
TCGA-BR-4187-01A-01R-1131-13	-10.4702	Low score	0.004	0.285	0.392	0.18	0.308	0.166	0.177	0.036	0.315	0.159	0.227	0.07	0	0.206	0.222	0.197	0.136	0.197	0.078	0.317	0.205	0.203	0.184	0.226
TCGA-D7-6521-01A-11R-1802-13	-10.3971	Low score	0.062	0.204	0.289	0.186	0.303	0.278	0.211	0.087	0.296	0.17	0.392	0.067	0	0.226	0.252	0.16	0.146	0.145	0.117	0.208	0.104	0.108	0.207	0.26
TCGA-BR-8365-01A-21R-2343-13	-10.2817	Low score	0.098	0.209	0.319	0.193	0.335	0.202	0.202	0.034	0.241	0.158	0.405	0.107	0	0.179	0.271	0.193	0.186	0.181	0.061	0.272	0.057	0.094	0.218	0.244
TCGA-B7-A5TN-01A-21R-A31P-31	-10.2724	Low score	0.006	0.203	0.204	0.199	0.275	0.243	0.179	0.103	0.093	0.224	0.304	0.066	0	0.122	0.179	0.159	0.092	0.103	0.118	0.15	0.128	0.117	0.094	0.128
TCGA-BR-6801-01A-11R-1884-13	-10.2127	Low score	0	0.105	0.218	0.085	0.124	0.184	0.092	0.053	0.078	0.219	0	0.024	0	0.238	0.149	0.161	0.13	0.127	0.16	0.143	0.138	0.098	0.045	0.101
TCGA-FP-8210-01A-11R-2343-13	-10.1359	Low score	0.086	0.246	0.366	0.233	0.411	0.303	0.278	0.041	0.318	0.12	0.457	0.1	0	0.193	0.209	0.162	0.196	0.145	0.042	0.287	0.071	0.148	0.239	0.289
TCGA-RD-A8N5-01A-12R-A36D-31	-9.95668	Low score	0	0.15	0.216	0.021	0.278	0.214	0.15	0.077	0.102	0.236	0.193	0.012	0	0.243	0.077	0.171	0.135	0.077	0.168	0.205	0.388	0.061	0.085	0.048
TCGA-BR-A44T-01A-32R-A24K-31	-9.87023	Low score	0.083	0.23	0.345	0.241	0.422	0.32	0.288	0.075	0.339	0.052	0.459	0.121	0	0.163	0.193	0.127	0.3	0.122	0.024	0.273	0.007	0.16	0.259	0.299
TCGA-IN-A7NU-01A-22R-A354-31	-9.85013	Low score	0.011	0.167	0.244	0.252	0.338	0.324	0.209	0.113	0.242	0.182	0.286	0.037	0	0.197	0.226	0.18	0.107	0.182	0.122	0.216	0.134	0.158	0.177	0.155
TCGA-D7-A4Z0-01A-22R-A251-31	-9.74391	Low score	0.072	0.209	0.26	0.191	0.383	0.296	0.241	0.097	0.202	0.179	0.414	0.076	0	0.224	0.226	0.099	0.216	0.163	0.076	0.22	0.195	0.047	0.202	0.166
TCGA-IN-AB1V-01A-21R-A414-31	-9.53589	Low score	0.058	0.17	0.215	0.155	0.256	0.188	0.15	0.018	0.272	0.277	0.201	0.125	0.009	0.128	0.104	0.056	0.165	0.15	0.078	0.116	0.169	0.054	0.106	0.173
TCGA-3M-AB47-01A-22R-A414-31	-9.53041	Low score	0.078	0.251	0.181	0.208	0.357	0.241	0.203	0.066	0.303	0.138	0.401	0.134	0	0.331	0.302	0.078	0.159	0.123	0.081	0.134	0.161	0.035	0.238	0.172
TCGA-IN-A6RN-01A-12R-A33Y-31	-9.45099	Low score	0.002	0.201	0.236	0.134	0.184	0.281	0.103	0.124	0.233	0.268	0.254	0.046	0	0.086	0.134	0.095	0.107	0.147	0.072	0.123	0.227	0.054	0.076	0.089
TCGA-BR-6705-01A-12R-1884-13	-9.43221	Low score	0.09	0.135	0.263	0.206	0.323	0.269	0.228	0.052	0.263	0.179	0.228	0.09	0	0.26	0.261	0.11	0.179	0.083	0.083	0.234	0.098	0.101	0.213	0.218
TCGA-BR-A4J5-01A-21R-A251-31	-9.40453	Low score	0.032	0.237	0.254	0.176	0.344	0.271	0.209	0.054	0.274	0.222	0.32	0.074	0	0.225	0.228	0.152	0.104	0.159	0.113	0.239	0.119	0.092	0.131	0.206
TCGA-MX-A5UG-01A-21R-A31P-31	-9.3233	Low score	0.097	0.216	0.315	0.253	0.437	0.314	0.287	0.024	0.285	0.148	0.387	0.104	0	0.174	0.26	0.108	0.202	0.128	0.04	0.227	0.122	0.119	0.249	0.254
TCGA-BR-8380-01A-11R-2343-13	-9.25834	Low score	0.06	0.233	0.177	0.18	0.249	0.171	0.155	0.011	0.171	0.241	0.248	0.089	0	0.184	0.229	0.146	0.197	0.172	0.073	0.235	0.119	0.047	0.153	0.148
TCGA-IN-A6RR-01A-12R-A32D-31	-9.22224	Low score	0.019	0.11	0.318	0.198	0.177	0.243	0.13	0.115	0.256	0.286	0.267	0.069	0	0.16	0.163	0.087	0.106	0.118	0.099	0.145	0.168	0.207	0.106	0.24
TCGA-D7-6520-01A-11R-1802-13	-9.06821	Low score	0.003	0.107	0.202	0.174	0.181	0.269	0.156	0.219	0.14	0.198	0.187	0.007	0	0.195	0.091	0.176	0.116	0.096	0.14	0.176	0.124	0.122	0.072	0.14
TCGA-CD-8524-01A-11R-2343-13	-8.96919	Low score	0.058	0.129	0.302	0.182	0.234	0.281	0.163	0.067	0.322	0.216	0.27	0.08	0.004	0.197	0.277	0.187	0.105	0.111	0.116	0.206	0.076	0.144	0.212	0.23
TCGA-BR-6453-01A-11R-1802-13	-8.94437	Low score	0.049	0.215	0.291	0.225	0.374	0.344	0.263	0.091	0.39	0.098	0.516	0.077	0	0.203	0.205	0.134	0.287	0.164	0.08	0.22	0.07	0.144	0.248	0.263
TCGA-D7-8574-01A-13R-2343-13	-8.72097	Low score	0.079	0.247	0.362	0.237	0.417	0.296	0.292	0.035	0.368	0.142	0.514	0.1	0	0.089	0.21	0.172	0.187	0.087	0.033	0.266	0.023	0.141	0.268	0.305
TCGA-BR-8059-01A-11R-2343-13	-8.71435	Low score	0	0.14	0.307	0.123	0.196	0.213	0.123	0.035	0.144	0.204	0.217	0.032	0	0.177	0.178	0.157	0.137	0.151	0.117	0.161	0.102	0.163	0.088	0.137
TCGA-CG-5719-01A-11R-1602-13	-8.52282	Low score	0.026	0.142	0.296	0.144	0.3	0.233	0.183	0.101	0.122	0.203	0.311	0.058	0	0.238	0.2	0.191	0.132	0.122	0.138	0.2	0.129	0.104	0.169	0.157
TCGA-CG-4301-01A-01R-1157-13	-8.4379	Low score	0.053	0.163	0.188	0.129	0.407	0.256	0.222	0.143	0.261	0.16	0.343	0.097	0	0.143	0.173	0.143	0.058	0.136	0.124	0.208	0.154	0.054	0.233	0.108
TCGA-RD-A8N0-01A-12R-A36D-31	-8.39541	Low score	0.061	0.231	0.371	0.27	0.442	0.281	0.274	0.035	0.393	0.141	0.517	0.104	0	0.15	0.17	0.113	0.221	0.164	0.026	0.239	0.03	0.2	0.245	0.302
TCGA-BR-8291-01A-11R-2343-13	-8.3862	Low score	0.03	0.22	0.362	0.217	0.399	0.241	0.218	0.047	0.259	0.227	0.404	0.088	0	0.116	0.241	0.186	0.076	0.183	0.101	0.245	0.108	0.159	0.21	0.235
TCGA-D7-8578-01A-21R-2343-13	-8.32727	Low score	0.01	0.235	0.289	0.148	0.293	0.206	0.164	0.035	0.274	0.213	0.253	0.062	0	0.193	0.233	0.176	0.163	0.161	0.103	0.184	0.141	0.083	0.158	0.149
TCGA-BR-8687-01A-11R-2402-13	-8.31442	Low score	0.02	0.154	0.228	0.041	0.212	0.181	0.123	0.082	0.109	0.277	0.239	0.07	0	0.191	0.094	0.162	0.097	0.121	0.129	0.214	0.138	0.015	0.086	0.12
TCGA-D7-6524-01A-11R-1802-13	-8.26128	Low score	0.056	0.194	0.198	0.122	0.312	0.261	0.195	0.066	0.074	0.167	0.33	0.046	0	0.259	0.172	0.141	0.137	0.106	0.119	0.166	0.273	0.058	0.149	0.105
TCGA-D7-A6EX-01A-11R-A31P-31	-8.13552	Low score	0.059	0.134	0.248	0.152	0.255	0.301	0.205	0.092	0.428	0.09	0.231	0.092	0	0.112	0.161	0.127	0.117	0.061	0.049	0.193	0.082	0.116	0.07	0.219
TCGA-VQ-A8PQ-01A-11R-A414-31	-7.88696	Low score	0.124	0.207	0.318	0.234	0.457	0.298	0.325	0.045	0.267	0.12	0.488	0.15	0	0.111	0.246	0.138	0.204	0.047	0.029	0.219	0.064	0.079	0.305	0.245
TCGA-CD-5813-01A-11R-1602-13	-7.73101	Low score	0.048	0.154	0.333	0.267	0.368	0.329	0.241	0.065	0.418	0.104	0.441	0.064	0	0.195	0.226	0.201	0.153	0.169	0.095	0.26	0.062	0.209	0.202	0.275
TCGA-KB-A93G-01A-11R-A39E-31	-7.64594	Low score	0.025	0.072	0.151	0.089	0.332	0.256	0.208	0.099	0.167	0.18	0.184	0.014	0	0.207	0.118	0.129	0.147	0.08	0.163	0.17	0.378	0.014	0.115	0.04
TCGA-CD-8530-01A-11R-2343-13	-7.59077	Low score	0.058	0.175	0.299	0.168	0.317	0.245	0.182	0.099	0.208	0.199	0.356	0.103	0	0.225	0.302	0.099	0.134	0.137	0.094	0.23	0.111	0.098	0.192	0.201
TCGA-HU-A4G3-01A-11R-A24K-31	-7.55751	Low score	0	0.224	0.346	0.103	0.18	0.123	0.096	0	0.118	0.308	0.18	0.026	0	0.188	0.121	0.144	0.148	0.166	0.111	0.14	0.185	0.111	0.068	0.117
TCGA-CD-5803-01A-11R-1602-13	-7.33544	Low score	0.059	0.155	0.41	0.255	0.383	0.35	0.261	0.075	0.365	0.085	0.505	0.108	0	0.198	0.229	0.197	0.131	0.121	0.069	0.259	0.025	0.229	0.232	0.288
TCGA-IN-A6RL-01A-11R-A32D-31	-7.30029	Low score	0.018	0.127	0.348	0.223	0.217	0.279	0.156	0.102	0.168	0.321	0.223	0.05	0	0.077	0.098	0.086	0.193	0.229	0.115	0.193	0.158	0.093	0.069	0.202
TCGA-VQ-AA6G-01A-11R-A414-31	-7.21127	Low score	0.011	0.17	0.136	0.052	0.158	0.217	0.12	0.094	0.125	0.245	0.184	0.05	0	0.201	0.067	0.072	0.062	0.068	0.1	0.106	0.332	0.061	0.106	0.038
TCGA-BR-7717-01A-11R-2055-13	-7.20611	Low score	0.045	0.156	0.277	0.098	0.146	0.204	0.084	0.074	0.377	0.247	0.228	0.048	0	0.153	0.207	0.157	0.179	0.094	0.113	0.154	0.087	0.109	0.118	0.185
TCGA-BR-8297-01A-12R-2343-13	-7.18644	Low score	0.078	0.196	0.242	0.198	0.285	0.222	0.182	0.032	0.105	0.173	0.343	0.112	0	0.186	0.267	0.113	0.172	0.123	0.084	0.193	0.077	0.119	0.168	0.211
TCGA-BR-A4J8-01A-11R-A251-31	-7.1834	Low score	0.005	0.204	0.262	0.116	0.126	0.141	0.092	0.059	0.161	0.243	0.217	0.099	0.013	0.192	0.267	0.123	0.177	0.125	0.114	0.178	0.089	0.117	0.128	0.177
TCGA-CD-5804-01A-12R-2055-13	-7.16041	Low score	0	0.221	0.323	0.213	0.2	0.209	0.107	0.055	0.194	0.171	0.246	0.013	0	0.242	0.191	0.206	0.156	0.173	0.16	0.229	0.154	0.161	0.119	0.238
TCGA-CG-5720-01A-11R-1602-13	-7.04505	Low score	0	0.182	0.31	0.268	0.362	0.314	0.212	0.141	0.132	0.195	0.283	0.008	0	0.305	0.176	0.167	0.146	0.15	0.104	0.2	0.253	0.139	0.15	0.176
TCGA-HU-8610-01A-22R-2402-13	-6.98897	Low score	0.058	0.092	0.276	0.185	0.459	0.33	0.289	0.139	0.26	0.211	0.421	0.062	0	0.09	0.193	0.151	0.074	0.008	0.141	0.171	0.143	0.178	0.235	0.173
TCGA-VQ-A927-01A-12R-A414-31	-6.73414	Low score	0.041	0.242	0.309	0.162	0.224	0.2	0.126	0.08	0.095	0.24	0.334	0.074	0	0.241	0.226	0.106	0.101	0.14	0.088	0.169	0.202	0.069	0.145	0.149
TCGA-IN-A7NR-01A-11R-A354-31	-6.67355	Low score	0.07	0.174	0.228	0.181	0.284	0.255	0.199	0.072	0.313	0.199	0.368	0.104	0	0.168	0.254	0.13	0.161	0.185	0.082	0.241	0.09	0.104	0.166	0.253
TCGA-BR-A44U-01A-11R-A36D-31	-6.57048	Low score	0	0.154	0.148	0.083	0.091	0.109	0.102	0.078	0.392	0.125	0	0.03	0	0.191	0.086	0.083	0.159	0.106	0.14	0.087	0.157	0.116	0.052	0.099
TCGA-BR-7959-01A-11R-2343-13	-6.52193	Low score	0.021	0.158	0.185	0.204	0.317	0.241	0.184	0.061	0.278	0.183	0.243	0.073	0	0.207	0.248	0.171	0.123	0.115	0.107	0.158	0.153	0.101	0.158	0.127
TCGA-RD-A7BS-01A-11R-A32D-31	-6.36818	Low score	0.02	0.192	0.402	0.208	0.341	0.261	0.199	0.089	0.251	0.173	0.363	0.056	0	0.172	0.206	0.161	0.193	0.216	0.076	0.258	0.167	0.188	0.195	0.243
TCGA-BR-4370-01A-01R-1157-13	-6.3642	Low score	0	0.218	0.385	0.23	0.39	0.3	0.246	0.127	0.222	0.115	0.366	0.028	0	0.117	0.257	0.185	0.096	0.153	0.096	0.239	0.207	0.174	0.192	0.179
TCGA-CG-5732-01A-11R-1602-13	-6.34623	Low score	0.057	0.234	0.367	0.218	0.31	0.314	0.224	0.137	0.207	0.191	0.351	0.046	0	0.218	0.194	0.147	0.216	0.189	0.067	0.261	0.15	0.184	0.143	0.258
TCGA-BR-8366-01A-11R-2343-13	-6.22471	Low score	0.043	0.151	0.387	0.287	0.396	0.305	0.258	0.107	0.325	0.066	0.387	0.093	0	0.177	0.199	0.157	0.149	0.156	0.106	0.219	0.042	0.284	0.217	0.263
TCGA-B7-A5TK-01A-12R-A36D-31	-6.12392	Low score	0	0.186	0.415	0.304	0.342	0.348	0.207	0.125	0.22	0.065	0.42	0.08	0	0.175	0.242	0.2	0.101	0.176	0.094	0.269	0.062	0.318	0.124	0.246
TCGA-IN-7806-01A-11R-2055-13	-6.03388	Low score	0.024	0.198	0.142	0.061	0.104	0.134	0.097	0	0.127	0.283	0.167	0.097	0.006	0.192	0.094	0.087	0.175	0.129	0.112	0.105	0.15	0.04	0.065	0.159
TCGA-VQ-A91Y-01A-11R-A414-31	-6.02952	Low score	0.096	0.207	0.262	0.249	0.35	0.268	0.226	0.078	0.302	0.132	0.366	0.119	0	0.159	0.27	0.171	0.113	0.14	0.077	0.192	0.052	0.145	0.221	0.227
TCGA-CG-5716-01A-21R-1802-13	-5.70405	Low score	0.053	0.171	0.297	0.28	0.309	0.355	0.223	0.096	0.181	0.216	0.424	0.084	0	0.23	0.231	0.088	0.185	0.138	0.062	0.177	0.114	0.037	0.207	0.193
TCGA-BR-6566-01A-11R-1802-13	-5.59645	Low score	0	0.164	0.413	0.315	0.257	0.342	0.137	0.143	0.059	0.196	0.257	0.005	0	0.173	0.12	0.139	0.149	0.113	0.182	0.154	0.133	0.281	0.051	0.171
TCGA-BR-8367-01A-11R-2343-13	-5.41194	Low score	0.041	0.239	0.288	0.136	0.289	0.171	0.183	0.038	0.133	0.259	0.315	0.087	0	0.188	0.238	0.137	0.129	0.154	0.1	0.156	0.156	0.015	0.192	0.131
TCGA-CG-4443-01A-01R-1157-13	-5.35241	Low score	0	0.013	0.155	0.076	0.215	0.194	0.112	0.153	0.295	0.289	0.191	0.029	0	0.097	0.038	0.135	0.11	0.042	0.127	0.121	0.169	0.068	0.004	0.122
TCGA-CD-5801-01A-11R-1602-13	-5.20218	Low score	0.01	0.134	0.416	0.28	0.343	0.345	0.207	0.101	0.356	0.036	0.491	0.091	0	0.16	0.2	0.187	0.1	0.101	0.078	0.178	0.018	0.331	0.219	0.29
TCGA-D7-6527-01A-11R-1802-13	-5.08009	Low score	0.026	0.105	0.293	0.164	0.263	0.277	0.187	0.135	0.13	0.305	0.268	0.027	0	0.276	0.189	0.15	0.113	0.131	0.079	0.207	0.124	0.116	0.143	0.225
TCGA-RD-A8MW-01A-11R-A36D-31	-5.07941	Low score	0.065	0.175	0.281	0.288	0.362	0.273	0.228	0.097	0.142	0.13	0.237	0.095	0	0.12	0.273	0.16	0.127	0.164	0.161	0.235	0.109	0.143	0.241	0.189
TCGA-IN-7808-01A-11R-2203-13	-5.01206	Low score	0.096	0.191	0.331	0.281	0.455	0.334	0.315	0.059	0.354	0.152	0.578	0.117	0	0.099	0.188	0.121	0.218	0.074	0.012	0.222	0	0.149	0.272	0.284
TCGA-BR-7901-01A-11R-2203-13	-4.93525	Low score	0.01	0.127	0.302	0.21	0.349	0.289	0.181	0.147	0.237	0.301	0.286	0.054	0	0.179	0.256	0.149	0.159	0.207	0.132	0.234	0.122	0.156	0.18	0.175
TCGA-BR-4367-01A-01R-1157-13	-4.90048	Low score	0.038	0.158	0.379	0.262	0.38	0.324	0.265	0.113	0.226	0.104	0.255	0.064	0	0.107	0.25	0.13	0.049	0.114	0.132	0.207	0.146	0.234	0.144	0.225
TCGA-VQ-A8PM-01A-21R-A414-31	-4.87048	Low score	0.099	0.215	0.315	0.289	0.368	0.282	0.242	0.095	0.179	0.135	0.43	0.081	0	0.179	0.248	0.082	0.155	0.131	0.064	0.2	0.12	0.157	0.224	0.226
TCGA-MX-A663-01A-11R-A31P-31	-4.86816	Low score	0.05	0.25	0.29	0.175	0.272	0.177	0.163	0.132	0.291	0.181	0.212	0.028	0	0.178	0.191	0.122	0.18	0.242	0.058	0.234	0.126	0.063	0.114	0.203
TCGA-BR-A4J4-01A-12R-A251-31	-4.84477	Low score	0	0.201	0.364	0.228	0.285	0.216	0.159	0.189	0.15	0.082	0.183	0.06	0.006	0.209	0.206	0.067	0.122	0.202	0.11	0.22	0.173	0.189	0.099	0.225
TCGA-D7-6519-01A-11R-1802-13	-4.83908	Low score	0	0.252	0.373	0.126	0.145	0.217	0.087	0	0.219	0.113	0.239	0.034	0	0.108	0.066	0.186	0.074	0.055	0.132	0.241	0.091	0.209	0.047	0.182
TCGA-BR-4267-01A-01R-1131-13	-4.82081	Low score	0.041	0.193	0.282	0.097	0.216	0.244	0.123	0.154	0.128	0.208	0.254	0.084	0.004	0.128	0.21	0.132	0.11	0.091	0.154	0.175	0.18	0.065	0.119	0.176
TCGA-BR-8690-01A-11R-2402-13	-4.72669	Low score	0.05	0.195	0.414	0.262	0.344	0.29	0.191	0.06	0.263	0.118	0.305	0.104	0	0.158	0.219	0.16	0.132	0.195	0.118	0.241	0.079	0.267	0.186	0.299
TCGA-HF-7131-01A-11R-2055-13	-4.6254	Low score	0.008	0.205	0.301	0.168	0.304	0.291	0.192	0.102	0.115	0.187	0.253	0.071	0	0.227	0.252	0.108	0.117	0.202	0.082	0.124	0.245	0.11	0.183	0.141
TCGA-VQ-A91K-01A-11R-A414-31	-4.61099	Low score	0.03	0.212	0.25	0.215	0.272	0.308	0.189	0.131	0.114	0.171	0.259	0.062	0	0.184	0.144	0.148	0.076	0.095	0.147	0.122	0.184	0.14	0.107	0.137
TCGA-RD-A8N9-01A-12R-A39E-31	-4.56503	Low score	0.079	0.181	0.256	0.266	0.362	0.3	0.247	0.05	0.334	0.232	0.409	0.089	0	0.206	0.258	0.156	0.128	0.133	0.083	0.217	0.063	0.14	0.232	0.227
TCGA-B7-A5TJ-01A-11R-A31P-31	-4.55059	Low score	0	0.205	0.168	0.048	0.136	0.205	0.114	0.009	0.187	0.27	0.108	0.049	0	0.193	0.078	0.14	0.098	0.093	0.15	0.144	0.157	0.086	0.043	0.102
TCGA-VQ-A8P8-01A-11R-A39E-31	-4.53267	Low score	0.074	0.197	0.241	0.248	0.345	0.297	0.235	0.091	0.147	0.164	0.418	0.097	0	0.249	0.227	0.08	0.208	0.104	0.042	0.143	0.128	0.07	0.22	0.151
TCGA-CD-8532-01A-11R-2343-13	-4.50554	Low score	0.022	0.224	0.406	0.265	0.38	0.305	0.252	0.098	0.295	0.139	0.5	0.086	0	0.165	0.204	0.207	0.103	0.157	0.077	0.233	0.073	0.186	0.22	0.255
TCGA-VQ-A8PC-01A-11R-A39E-31	-4.42737	Low score	0.061	0.17	0.262	0.256	0.353	0.235	0.196	0.066	0.3	0.2	0.314	0.111	0	0.127	0.247	0.143	0.141	0.135	0.094	0.181	0.165	0.077	0.21	0.159
TCGA-CD-8529-01A-11R-2343-13	-4.36785	Low score	0.06	0.209	0.346	0.263	0.377	0.315	0.255	0.136	0.155	0.168	0.331	0.057	0	0.201	0.271	0.21	0.146	0.125	0.115	0.266	0.06	0.147	0.21	0.256
TCGA-BR-7957-01A-11R-2203-13	-4.30417	Low score	0.063	0.268	0.244	0.132	0.224	0.162	0.135	0	0.151	0.181	0.322	0.085	0	0.199	0.206	0.155	0.111	0.131	0.089	0.233	0.16	0.039	0.15	0.155
TCGA-B7-5818-01A-11R-1602-13	-4.26855	Low score	0.012	0.085	0.386	0.25	0.366	0.303	0.165	0.177	0.08	0.13	0.333	0.077	0	0.108	0.216	0.185	0.062	0.119	0.173	0.183	0.141	0.271	0.11	0.217
TCGA-F1-A448-01A-11R-A24K-31	-4.05286	Low score	0	0.182	0.278	0.239	0.398	0.319	0.244	0.085	0.097	0.183	0.341	0.035	0	0.261	0.22	0.151	0.18	0.131	0.122	0.168	0.249	0.127	0.176	0.137
TCGA-CG-4304-01A-01R-1157-13	-4.0297	Low score	0.03	0.237	0.327	0.257	0.413	0.243	0.246	0.137	0.243	0.235	0.346	0.071	0	0.031	0.271	0.12	0.119	0.07	0.082	0.216	0.274	0.129	0.226	0.164
TCGA-VQ-A91Q-01A-12R-A414-31	-4.01432	Low score	0.044	0.12	0.13	0.066	0.243	0.25	0.187	0.11	0.167	0.286	0.207	0.072	0	0.127	0.037	0.132	0.057	0.056	0.049	0.183	0.228	0.077	0.094	0.072
TCGA-ZQ-A9CR-01A-11R-A39E-31	-3.9437	Low score	0.077	0.112	0.402	0.214	0.316	0.28	0.189	0.103	0.152	0.103	0.34	0.102	0	0.155	0.298	0.146	0.088	0.102	0.089	0.172	0.202	0.25	0.233	0.161
TCGA-CG-4476-01A-01R-1157-13	-3.84761	Low score	0.056	0.192	0.349	0.165	0.361	0.238	0.212	0.04	0.37	0.214	0.426	0.111	0	0.147	0.235	0.14	0.119	0.208	0.097	0.25	0.14	0.123	0.227	0.225
TCGA-BR-4256-01A-01R-1131-13	-3.73071	Low score	0.008	0.164	0.446	0.249	0.385	0.273	0.228	0.048	0.275	0.122	0.322	0.034	0	0.139	0.187	0.177	0.15	0.189	0.216	0.202	0.254	0.24	0.156	0.211
TCGA-VQ-AA6F-01A-31R-A414-31	-3.7231	Low score	0.081	0.136	0.343	0.294	0.266	0.28	0.197	0.148	0.154	0.121	0.384	0.083	0	0.232	0.258	0.135	0.168	0.1	0.056	0.144	0.106	0.141	0.193	0.226
TCGA-CD-8527-01A-11R-2343-13	-3.71948	Low score	0	0.253	0.3	0.158	0.052	0.143	0.079	0.032	0.258	0.186	0.138	0	0	0.155	0.156	0.187	0.109	0.111	0.135	0.163	0.184	0.213	0.022	0.231
TCGA-BR-8677-01A-11R-2402-13	-3.62721	Low score	0.043	0.185	0.393	0.29	0.368	0.347	0.237	0.088	0.337	0.103	0.315	0.081	0	0.215	0.249	0.128	0.125	0.122	0.052	0.221	0.125	0.22	0.189	0.309
TCGA-BR-8683-01A-11R-2402-13	-3.61794	Low score	0.05	0.235	0.244	0.214	0.377	0.257	0.234	0.068	0.167	0.147	0.26	0.086	0	0.307	0.263	0.076	0.15	0.212	0.048	0.218	0.226	0.1	0.174	0.175
TCGA-BR-8369-01A-11R-2343-13	-3.45027	Low score	0.072	0.157	0.161	0.135	0.195	0.151	0.13	0	0.165	0.256	0.215	0.127	0.016	0.214	0.222	0.054	0.223	0.122	0.109	0.152	0.14	0.009	0.141	0.163
TCGA-SW-A7EB-01A-11R-A354-31	-3.39536	Low score	0.054	0.268	0.361	0.24	0.352	0.28	0.232	0.14	0.336	0.173	0.391	0.062	0	0.123	0.202	0.122	0.167	0.249	0.032	0.198	0.057	0.122	0.171	0.216
TCGA-HU-A4GY-01A-21R-A24K-31	-3.39214	Low score	0.08	0.234	0.318	0.258	0.468	0.309	0.304	0.049	0.353	0.087	0.483	0.131	0	0.116	0.168	0.166	0.168	0.119	0.06	0.272	0.024	0.156	0.265	0.285
TCGA-VQ-A8PD-01A-11R-A414-31	-3.38625	Low score	0.081	0.225	0.394	0.243	0.453	0.279	0.271	0.044	0.294	0.117	0.454	0.104	0	0.168	0.252	0.153	0.178	0.127	0.037	0.228	0.121	0.185	0.248	0.254
TCGA-HF-7132-01A-11R-2055-13	-3.36081	Low score	0.045	0.201	0.391	0.255	0.389	0.327	0.263	0.052	0.286	0.187	0.452	0.092	0	0.192	0.23	0.149	0.173	0.159	0.073	0.235	0.072	0.192	0.189	0.279
TCGA-D7-A74A-01A-11R-A32D-31	-3.34715	Low score	0	0.167	0.295	0.239	0.194	0.291	0.165	0.108	0.342	0.098	0.266	0.056	0	0.098	0.126	0.114	0.092	0.116	0.111	0.156	0.118	0.168	0.067	0.237
TCGA-HU-8238-01A-11R-2343-13	-3.33639	Low score	0.001	0.213	0.28	0.203	0.324	0.284	0.214	0.116	0.164	0.261	0.29	0.039	0	0.305	0.208	0.124	0.168	0.198	0.097	0.131	0.174	0.127	0.137	0.172
TCGA-BR-6709-01A-11R-1884-13	-3.29809	Low score	0.045	0.133	0.425	0.293	0.39	0.39	0.269	0.097	0.356	0.083	0.351	0.088	0	0.114	0.204	0.176	0.07	0.065	0.108	0.228	0.096	0.229	0.221	0.273
TCGA-BR-8382-01A-11R-2402-13	-3.29092	Low score	0.014	0.184	0.351	0.205	0.28	0.285	0.157	0.124	0.056	0.099	0.341	0.057	0	0.244	0.159	0.129	0.108	0.123	0.136	0.162	0.188	0.248	0.112	0.182
TCGA-HU-A4HB-01A-12R-A251-31	-3.23448	Low score	0.057	0.244	0.346	0.278	0.416	0.309	0.287	0.107	0.295	0.12	0.516	0.086	0	0.194	0.174	0.122	0.258	0.146	0.055	0.19	0.118	0.164	0.221	0.228
TCGA-KB-A93J-01A-11R-A39E-31	-3.22026	Low score	0	0.164	0.379	0.275	0.243	0.303	0.147	0.104	0.267	0.157	0.329	0.067	0	0.101	0.233	0.203	0.037	0.095	0.143	0.237	0.125	0.212	0.13	0.243
TCGA-FP-7735-01A-11R-2055-13	-3.2019	Low score	0.012	0.173	0.287	0.243	0.348	0.292	0.199	0.097	0.469	0.161	0.295	0.082	0	0.203	0.287	0.174	0.147	0.12	0.084	0.152	0.064	0.114	0.18	0.21
TCGA-FP-7916-01A-11R-2203-13	-3.17151	Low score	0.047	0.161	0.376	0.275	0.418	0.299	0.271	0.075	0.326	0.07	0.41	0.096	0	0.169	0.243	0.178	0.133	0.132	0.071	0.214	0.052	0.243	0.241	0.276
TCGA-BR-8590-01A-11R-2402-13	-3.16809	Low score	0.066	0.209	0.322	0.218	0.371	0.261	0.237	0.054	0.269	0.137	0.409	0.103	0	0.205	0.229	0.192	0.16	0.177	0.1	0.241	0.084	0.117	0.21	0.22
TCGA-BR-4191-01A-02R-1131-13	-3.08753	Low score	0.036	0.148	0.428	0.246	0.415	0.292	0.238	0.083	0.207	0.124	0.422	0.056	0	0.168	0.23	0.175	0.125	0.171	0.139	0.277	0.139	0.225	0.232	0.228
TCGA-CD-5799-01A-11R-1602-13	-3.00423	Low score	0	0.154	0.163	0.053	0	0.043	0	0.092	0.162	0.277	0.097	0	0	0.205	0.069	0.16	0.122	0.093	0.15	0.121	0.187	0.129	0.005	0.095
TCGA-D7-6818-01A-11R-1884-13	-3.0011	Low score	0.006	0.144	0.212	0.07	0.207	0.208	0.134	0.032	0.325	0.256	0.094	0	0	0.198	0.09	0.248	0.105	0.187	0.166	0.276	0.184	0.069	0.091	0.091
TCGA-BR-8373-01A-11R-2343-13	-2.95626	Low score	0.03	0.259	0.274	0.161	0.334	0.25	0.229	0.099	0.159	0.221	0.227	0.034	0	0.142	0.193	0.102	0.069	0.144	0.085	0.229	0.226	0.012	0.133	0.17
TCGA-RD-A8N6-01A-11R-A36D-31	-2.92292	Low score	0.039	0.186	0.233	0.177	0.19	0.188	0.12	0.09	0.166	0.218	0.242	0.068	0	0.118	0.208	0.154	0.104	0.178	0.11	0.211	0.169	0.031	0.109	0.141
TCGA-VQ-A91V-01A-11R-A414-31	-2.92215	Low score	0	0.219	0.209	0.097	0.185	0.135	0.098	0.075	0.14	0.325	0.202	0.088	0	0.128	0.153	0.127	0.06	0.088	0.092	0.154	0.182	0.067	0.088	0.132
TCGA-HU-A4H6-01A-11R-A251-31	-2.85035	Low score	0.027	0.153	0.31	0.229	0.274	0.312	0.184	0.104	0.284	0.17	0.323	0.079	0	0.231	0.25	0.158	0.186	0.111	0.095	0.169	0.157	0.139	0.179	0.203
TCGA-CG-4475-01A-01R-1157-13	-2.81507	Low score	0.002	0.086	0.087	0.073	0.279	0.214	0.159	0.116	0.216	0.261	0.202	0.029	0	0.136	0.112	0.142	0.117	0.14	0.136	0.185	0.25	0.047	0.112	0.032
TCGA-BR-6456-01A-11R-1802-13	-2.75197	Low score	0.063	0.095	0.253	0.201	0.331	0.263	0.218	0.112	0.132	0.145	0.25	0.099	0	0.255	0.288	0.15	0.125	0.214	0.121	0.203	0.093	0.17	0.206	0.165
TCGA-R5-A805-01A-11R-A36D-31	-2.74469	Low score	0.015	0.218	0.337	0.181	0.358	0.282	0.186	0.059	0.156	0.151	0.29	0.017	0	0.182	0.219	0.161	0.181	0.137	0.19	0.19	0.375	0.121	0.171	0.151
TCGA-RD-A8MV-01A-11R-A36D-31	-2.68175	Low score	0.05	0.242	0.438	0.249	0.436	0.28	0.26	0.056	0.231	0.08	0.401	0.058	0	0.126	0.215	0.181	0.173	0.096	0.118	0.204	0.218	0.21	0.192	0.244
TCGA-BR-8296-01A-11R-2343-13	-2.67254	Low score	0.056	0.204	0.35	0.233	0.415	0.313	0.259	0.036	0.22	0.175	0.443	0.106	0	0.193	0.261	0.111	0.23	0.162	0.045	0.258	0.124	0.122	0.252	0.254
TCGA-SW-A7EA-01A-12R-A354-31	-2.6019	Low score	0	0.162	0.499	0.254	0.165	0.245	0.114	0.133	0.132	0.137	0.231	0.023	0	0	0.134	0.163	0.054	0.07	0.133	0.155	0.109	0.325	0.023	0.256
TCGA-D7-6525-01A-11R-1802-13	-2.59516	Low score	0	0.11	0.313	0.155	0.101	0.198	0.037	0.092	0.205	0.171	0	0	0	0.181	0.125	0.198	0.126	0.11	0.183	0.178	0.092	0.217	0.036	0.142
TCGA-CD-A48C-01A-11R-A24K-31	-2.51334	Low score	0	0.189	0.284	0.209	0.254	0.284	0.141	0.115	0.244	0.146	0.242	0.054	0.031	0.084	0.194	0.116	0.076	0.107	0.126	0.163	0.089	0.204	0.105	0.206
TCGA-FP-A8CX-01A-11R-A36D-31	-2.22142	Low score	0.041	0.207	0.195	0.235	0.302	0.246	0.163	0.139	0.194	0.203	0.264	0.085	0	0.207	0.246	0.099	0.137	0.129	0.13	0.135	0.154	0.075	0.187	0.148
TCGA-CD-A48A-01A-12R-A36D-31	-2.14512	Low score	0	0.165	0.282	0.175	0.203	0.204	0.128	0.026	0.317	0.152	0.283	0.054	0	0.172	0.181	0.187	0.197	0.138	0.159	0.201	0.119	0.08	0.119	0.177
TCGA-BR-7196-01A-11R-2055-13	-2.1413	Low score	0.025	0.176	0.337	0.256	0.361	0.298	0.203	0.065	0.16	0.095	0.358	0.085	0	0.201	0.243	0.163	0.195	0.109	0.081	0.253	0.093	0.208	0.184	0.281
TCGA-BR-A4CS-01A-11R-A24K-31	-1.88738	Low score	0	0.073	0.217	0.113	0.158	0.229	0.153	0.177	0.278	0.239	0.146	0	0	0.208	0.179	0.139	0.063	0.101	0.154	0.196	0.232	0.208	0.039	0.135
TCGA-HU-A4GC-01A-12R-A251-31	-1.81358	Low score	0.001	0.247	0.327	0.225	0.186	0.202	0.104	0.081	0.361	0.174	0.31	0.069	0	0.131	0.225	0.113	0.14	0.196	0.077	0.166	0.131	0.185	0.124	0.18
TCGA-BR-8588-01A-11R-2402-13	-1.7853	Low score	0.039	0.232	0.334	0.221	0.355	0.296	0.224	0.066	0.278	0.145	0.4	0.074	0	0.282	0.194	0.149	0.143	0.206	0.088	0.234	0.176	0.177	0.187	0.216
TCGA-BR-8080-01A-11R-2343-13	-1.65494	Low score	0.059	0.165	0.311	0.205	0.346	0.307	0.246	0.05	0.293	0.155	0.369	0.075	0	0.224	0.261	0.16	0.151	0.164	0.072	0.242	0.08	0.18	0.197	0.266
TCGA-BR-8058-01A-31R-2343-13	-1.62856	Low score	0.059	0.207	0.39	0.247	0.421	0.313	0.267	0.065	0.271	0.137	0.474	0.086	0	0.173	0.243	0.197	0.123	0.14	0.072	0.219	0.097	0.193	0.218	0.246
TCGA-FP-8211-01A-11R-2343-13	-1.59345	Low score	0.005	0.192	0.348	0.22	0.352	0.285	0.229	0.127	0.34	0.219	0.422	0.102	0	0.23	0.258	0.142	0.107	0.105	0.059	0.169	0.05	0.174	0.218	0.217
TCGA-VQ-A928-01A-11R-A414-31	-1.51625	Low score	0.014	0.157	0.169	0.112	0.273	0.285	0.199	0.152	0.193	0.197	0.222	0.045	0	0.162	0.141	0.123	0.103	0.062	0.092	0.166	0.179	0.056	0.08	0.097
TCGA-VQ-A8PJ-01A-11R-A414-31	-1.51156	Low score	0	0.203	0.309	0.124	0.077	0.129	0.051	0.075	0.17	0.268	0.11	0.038	0	0.088	0.17	0.083	0.04	0.079	0.098	0.118	0.222	0.051	0.045	0.152
TCGA-CG-5723-01A-11R-1602-13	-1.5064	Low score	0	0.155	0.461	0.291	0.357	0.362	0.219	0.147	0.197	0.078	0.291	0.029	0	0.15	0.155	0.203	0.118	0.147	0.146	0.264	0.123	0.279	0.075	0.257
TCGA-CG-5724-01A-11R-1602-13	-1.44735	Low score	0.002	0.105	0.305	0.166	0.203	0.298	0.126	0.127	0.125	0.112	0.07	0.004	0	0.066	0.128	0.167	0.109	0.091	0.178	0.17	0.148	0.229	0.043	0.198
TCGA-VQ-A8E0-01A-11R-A414-31	-1.41646	Low score	0.033	0.07	0.137	0.136	0.347	0.266	0.242	0.181	0.023	0.258	0.233	0.045	0	0.237	0.115	0.111	0.076	0.095	0.151	0.191	0.208	0.078	0.084	0.081
TCGA-R5-A7ZR-01A-11R-A354-31	-1.41437	Low score	0.022	0.205	0.261	0.233	0.247	0.238	0.169	0.22	0.178	0.161	0.235	0.051	0	0.163	0.154	0.099	0.11	0.043	0.13	0.079	0.161	0.057	0.139	0.151
TCGA-VQ-A91D-01A-11R-A414-31	-1.39471	Low score	0	0.12	0.332	0.23	0.255	0.265	0.151	0.113	0.202	0.203	0.269	0.038	0	0.022	0.078	0.156	0.072	0	0.152	0.147	0.172	0.255	0.029	0.205
TCGA-D7-5577-01A-01R-1602-13	-1.25002	Low score	0.027	0.143	0.405	0.267	0.313	0.343	0.189	0.134	0.281	0.055	0.369	0.068	0	0.186	0.198	0.179	0.097	0.136	0.143	0.205	0.07	0.323	0.153	0.242
TCGA-CG-4441-01A-01R-1802-13	-1.21304	Low score	0.021	0.157	0.338	0.21	0.226	0.297	0.165	0.174	0.109	0.226	0.218	0.015	0	0.126	0.169	0.163	0.063	0.056	0.121	0.162	0.229	0.185	0.1	0.168
TCGA-IN-A6RS-01A-12R-A354-31	-1.19608	Low score	0.035	0.165	0.385	0.253	0.32	0.26	0.2	0.13	0.259	0.071	0.225	0.052	0	0.217	0.319	0.09	0.074	0.136	0.087	0.158	0.173	0.311	0.164	0.218
TCGA-D7-5578-01A-01R-1602-13	-1.19596	Low score	0.025	0.186	0.329	0.235	0.301	0.319	0.195	0.099	0.144	0.113	0.337	0.031	0	0.357	0.249	0.143	0.181	0.187	0.087	0.217	0.168	0.18	0.13	0.228
TCGA-FP-A4BF-01A-12R-A36D-31	-1.19555	Low score	0.028	0.186	0.425	0.265	0.429	0.306	0.232	0.095	0.393	0.1	0.381	0.052	0	0.028	0.231	0.183	0.067	0.099	0.114	0.237	0.096	0.31	0.217	0.269
TCGA-HJ-7597-01A-21R-2203-13	-1.11362	Low score	0.017	0.161	0.453	0.297	0.334	0.265	0.212	0.099	0.157	0.105	0.265	0.106	0	0.12	0.183	0.124	0.141	0.111	0.046	0.197	0.132	0.272	0.11	0.26
TCGA-VQ-A8DT-01A-11R-A36D-31	-1.05121	Low score	0.01	0.214	0.323	0.187	0.172	0.23	0.117	0.083	0.198	0.241	0.322	0.081	0	0.142	0.169	0.138	0.044	0.053	0.069	0.172	0.196	0.149	0.094	0.187
TCGA-VQ-A8PP-01A-21R-A414-31	-1.03178	Low score	0.034	0.171	0.327	0.267	0.339	0.337	0.249	0.089	0.222	0.131	0.372	0.075	0	0.05	0.233	0.164	0.078	0.032	0.086	0.203	0.084	0.205	0.107	0.235
TCGA-VQ-A8E7-01B-11R-A414-31	-0.978866	Low score	0.001	0.221	0.212	0.162	0.102	0.127	0.088	0.097	0.118	0.18	0.026	0.048	0	0.168	0.178	0.077	0.089	0.112	0.08	0.118	0.292	0.076	0.054	0.127
TCGA-MX-A5UJ-01A-11R-A31P-31	-0.949412	Low score	0.041	0.182	0.284	0.219	0.243	0.262	0.167	0.104	0.051	0.193	0.278	0.083	0	0.235	0.218	0.105	0.203	0.173	0.068	0.184	0.158	0.144	0.11	0.187
TCGA-BR-6458-01A-11R-1802-13	-0.836175	Low score	0.073	0.158	0.362	0.219	0.35	0.351	0.253	0.082	0.3	0.142	0.243	0.103	0	0.137	0.259	0.142	0.091	0.054	0.093	0.238	0.039	0.21	0.2	0.263
TCGA-VQ-A8PU-01A-12R-A414-31	-0.775507	Low score	0.004	0.073	0.229	0	0.027	0.09	0.016	0.003	0.217	0.164	0.156	0.072	0	0.18	0	0.132	0.075	0.09	0.109	0.121	0.249	0.098	0.04	0.076
TCGA-BR-8487-01A-11R-2402-13	-0.699817	Low score	0	0.183	0.392	0.208	0.229	0.256	0.129	0.102	0.185	0.254	0.275	0.078	0	0.023	0.21	0.166	0.11	0.065	0.179	0.155	0.094	0.226	0.084	0.206
TCGA-CG-5721-01A-11R-1602-13	-0.644732	Low score	0.031	0.15	0.489	0.282	0.378	0.385	0.258	0.118	0.362	0.051	0.394	0.049	0	0.135	0.13	0.23	0.094	0.121	0.126	0.284	0.043	0.335	0.123	0.322
TCGA-BR-7704-01A-11R-2055-13	-0.639777	Low score	0.057	0.119	0.421	0.259	0.354	0.318	0.228	0.107	0.336	0.155	0.438	0.089	0	0.152	0.287	0.187	0.093	0.149	0.063	0.25	0.02	0.292	0.211	0.306
TCGA-BR-4201-01A-01R-1131-13	-0.600643	Low score	0.014	0.211	0.379	0.185	0.335	0.266	0.191	0.116	0.288	0.119	0.235	0.044	0	0.14	0.158	0.171	0.115	0.224	0.114	0.239	0.194	0.215	0.159	0.166
TCGA-VQ-A92D-01A-11R-A414-31	-0.560865	High score	0	0.169	0.33	0.089	0.078	0.169	0.084	0.114	0.14	0.238	0.033	0.005	0	0.118	0.107	0.037	0.071	0.049	0.074	0.108	0.21	0.128	0.064	0.094
TCGA-HU-A4H3-01A-21R-A251-31	-0.544258	High score	0	0.163	0.417	0.232	0.25	0.317	0.194	0.184	0.034	0.178	0.162	0.052	0	0.099	0.241	0.094	0.073	0.135	0.074	0.172	0.177	0.272	0.074	0.196
TCGA-D7-6815-01A-11R-1884-13	-0.421967	High score	0.006	0.247	0.214	0.177	0.254	0.226	0.205	0.115	0.155	0.242	0.244	0.037	0	0.165	0.228	0.124	0.062	0.052	0.123	0.164	0.146	0.091	0.106	0.169
TCGA-HU-A4H5-01A-21R-A251-31	-0.254224	High score	0.007	0.108	0.275	0.155	0.341	0.22	0.204	0.148	0.259	0.243	0.208	0.067	0	0.1	0.223	0.081	0.07	0.054	0.1	0.099	0.158	0.159	0.131	0.205
TCGA-BR-8686-01A-11R-2402-13	-0.242711	High score	0.068	0.156	0.387	0.266	0.387	0.295	0.227	0.041	0.346	0.117	0.371	0.127	0	0.17	0.218	0.128	0.14	0.182	0.056	0.246	0.097	0.222	0.236	0.266
TCGA-VQ-A8DZ-01A-11R-A36D-31	-0.212873	High score	0	0.253	0.322	0.079	0.138	0.177	0.067	0.026	0.236	0.179	0.132	0.022	0	0.189	0.147	0.125	0.096	0.124	0.115	0.192	0.209	0.124	0.035	0.161
TCGA-VQ-A8PX-01A-12R-A414-31	-0.211924	High score	0.05	0.189	0.365	0.217	0.293	0.296	0.194	0.098	0.221	0.22	0.324	0.094	0	0.092	0.188	0.081	0.121	0.09	0.06	0.146	0.205	0.111	0.122	0.225
TCGA-VQ-A91U-01A-11R-A414-31	-0.114451	High score	0.017	0.205	0.33	0.288	0.324	0.305	0.215	0.095	0.231	0.177	0.287	0.087	0	0.162	0.231	0.08	0.074	0.088	0.089	0.132	0.129	0.226	0.171	0.251
TCGA-BR-7716-01A-21R-2055-13	-0.0924852	High score	0.041	0.153	0.397	0.261	0.383	0.316	0.266	0.118	0.316	0.073	0.35	0.038	0	0.182	0.241	0.201	0.145	0.235	0.12	0.263	0.088	0.194	0.175	0.203
TCGA-VQ-A8DV-01A-12R-A36D-31	0.0556529	High score	0	0.164	0.337	0.111	0.052	0	0.047	0.035	0.29	0.222	0.108	0	0	0.041	0.159	0.089	0.094	0.22	0.07	0.142	0.184	0.1	0.04	0.194
TCGA-R5-A7ZI-01A-11R-A354-31	0.0670092	High score	0.037	0.168	0.446	0.302	0.38	0.363	0.236	0.12	0.299	0.082	0.454	0.048	0	0.179	0.173	0.22	0.087	0.024	0.113	0.181	0.125	0.292	0.157	0.278
TCGA-R5-A7ZE-01B-11R-A354-31	0.0872543	High score	0	0.197	0.164	0.07	0	0.039	0.017	0.094	0.305	0.237	0.071	0	0	0.096	0.128	0.089	0	0.083	0.071	0.14	0.268	0.098	0.015	0.097
TCGA-CD-8534-01A-11R-2343-13	0.0874525	High score	0.042	0.244	0.307	0.202	0.333	0.244	0.204	0.029	0.267	0.203	0.334	0.104	0	0.183	0.229	0.181	0.122	0.167	0.085	0.191	0.096	0.073	0.174	0.232
TCGA-BR-8077-01A-11R-2343-13	0.319166	High score	0.029	0.205	0.347	0.254	0.353	0.256	0.215	0.143	0.25	0.099	0.372	0.06	0	0.214	0.253	0.153	0.065	0.18	0.107	0.232	0.138	0.225	0.201	0.23
TCGA-HU-A4GX-01A-12R-A251-31	0.324441	High score	0.006	0.241	0.346	0.323	0.323	0.304	0.218	0.115	0.322	0.074	0.306	0.089	0	0.248	0.148	0.125	0.154	0.136	0.103	0.153	0.143	0.288	0.085	0.292
TCGA-D7-8576-01A-11R-2343-13	0.324832	High score	0.037	0.135	0.196	0.1	0.195	0.199	0.13	0.083	0.229	0.204	0.17	0.066	0	0.126	0.213	0.142	0.086	0.107	0.184	0.14	0.171	0.044	0.105	0.118
TCGA-FP-7998-01A-11R-2203-13	0.339646	High score	0.048	0.136	0.351	0.29	0.446	0.315	0.288	0.053	0.268	0.063	0.482	0.101	0	0.164	0.24	0.19	0.131	0.151	0.08	0.214	0.087	0.233	0.239	0.262
TCGA-CG-4437-01A-01R-1802-13	0.379136	High score	0	0.123	0.452	0.241	0.28	0.361	0.186	0.115	0.11	0.098	0.304	0.014	0	0.197	0.209	0.152	0.179	0.137	0.136	0.152	0.153	0.279	0.105	0.237
TCGA-D7-A6EY-01A-21R-A31P-31	0.402994	High score	0.064	0.157	0.409	0.258	0.366	0.349	0.25	0.079	0.187	0.107	0.464	0.082	0	0.218	0.217	0.196	0.163	0.119	0.093	0.226	0.125	0.222	0.169	0.269
TCGA-BR-6852-01A-11R-1884-13	0.409844	High score	0	0.179	0.425	0.317	0.358	0.375	0.232	0.134	0.234	0.085	0.405	0.048	0	0.161	0.21	0.195	0.081	0.064	0.096	0.223	0.128	0.304	0.139	0.274
TCGA-BR-6454-01A-11R-1802-13	0.466308	High score	0.024	0.18	0.461	0.273	0.37	0.325	0.251	0.118	0.386	0.161	0.476	0.052	0	0.124	0.196	0.208	0.102	0.114	0.072	0.237	0.093	0.257	0.182	0.315
TCGA-HU-A4GP-01A-11R-A251-31	0.478884	High score	0.012	0.184	0.213	0.173	0.218	0.224	0.12	0.046	0.183	0.22	0.203	0.094	0	0.177	0.219	0.09	0.131	0.097	0.098	0.14	0.197	0.066	0.092	0.133
TCGA-HU-A4G2-01A-11R-A251-31	0.562584	High score	0.025	0.119	0.404	0.238	0.178	0.245	0.104	0.097	0.209	0.149	0.344	0.068	0	0.071	0.25	0.145	0.079	0.123	0.117	0.161	0.1	0.252	0.124	0.183
TCGA-VQ-A8P3-01A-11R-A36D-31	0.733812	High score	0	0.14	0.442	0.276	0.244	0.352	0.192	0.131	0.227	0.159	0.185	0.03	0	0.127	0.257	0.101	0.116	0.093	0.047	0.153	0.134	0.275	0.054	0.214
TCGA-HU-A4GQ-01A-11R-A36D-31	0.761303	High score	0.002	0.157	0.341	0.257	0.211	0.234	0.119	0.148	0.045	0.113	0.297	0.033	0	0.209	0.157	0.131	0.135	0.154	0.132	0.167	0.152	0.237	0.023	0.16
TCGA-D7-A6F2-01A-12R-A31P-31	0.802954	High score	0.063	0.206	0.345	0.208	0.375	0.248	0.233	0.066	0.278	0.113	0.359	0.086	0	0.182	0.206	0.164	0.059	0.112	0.112	0.191	0.19	0.178	0.16	0.215
TCGA-BR-4366-01A-01R-1157-13	0.806158	High score	0.013	0.25	0.278	0.096	0.171	0.142	0.125	0.074	0.253	0.3	0.223	0.002	0	0.057	0.192	0.126	0.085	0.142	0.156	0.205	0.177	0.04	0.092	0.194
TCGA-B7-A5TI-01A-11R-A31P-31	0.820868	High score	0.049	0.138	0.308	0.242	0.268	0.252	0.185	0.144	0.161	0.139	0.271	0.071	0	0.146	0.268	0.118	0.119	0.144	0.092	0.178	0.15	0.123	0.141	0.179
TCGA-F1-A72C-01A-21R-A33Y-31	0.833582	High score	0.004	0.16	0.322	0.326	0.334	0.24	0.198	0.171	0.118	0.149	0.323	0.058	0	0.19	0.231	0.14	0.125	0.112	0.092	0.18	0.109	0.281	0.141	0.215
TCGA-BR-8484-01A-11R-2402-13	0.992055	High score	0.064	0.164	0.324	0.239	0.419	0.295	0.273	0.062	0.401	0.161	0.401	0.12	0	0.062	0.253	0.138	0.062	0.117	0.109	0.18	0.119	0.168	0.238	0.255
TCGA-VQ-AA68-01A-11R-A414-31	1.0073	High score	0	0.199	0.273	0.191	0.321	0.308	0.198	0.11	0.362	0.175	0.227	0.065	0	0.136	0.19	0.112	0.136	0.146	0.08	0.166	0.149	0.125	0.164	0.16
TCGA-BR-8483-01A-31R-2402-13	1.06675	High score	0	0.181	0.241	0.136	0.065	0.179	0.092	0.061	0.252	0.264	0.109	0.034	0	0.162	0.171	0.086	0.104	0.095	0.11	0.033	0.103	0.146	0.052	0.168
TCGA-IN-8663-01A-11R-2402-13	1.1387	High score	0.03	0.182	0.18	0.088	0.062	0.132	0.074	0.032	0.272	0.148	0.175	0.044	0	0.112	0.102	0.133	0.058	0.055	0.117	0.072	0.128	0.157	0.117	0.123
TCGA-VQ-AA64-01A-11R-A414-31	1.2045	High score	0.019	0.141	0.221	0.192	0.197	0.172	0.142	0.086	0.221	0.257	0.241	0.066	0	0.18	0.226	0.117	0.101	0.081	0.063	0.169	0.153	0.091	0.107	0.152
TCGA-CG-4438-01A-01R-1157-13	1.26857	High score	0.012	0.254	0.42	0.212	0.278	0.278	0.218	0.084	0.305	0.046	0.338	0.057	0	0.24	0.198	0.164	0.091	0.15	0.113	0.224	0.152	0.283	0.132	0.252
TCGA-CD-A486-01A-11R-A24K-31	1.34433	High score	0.058	0.175	0.289	0.177	0.21	0.258	0.127	0.154	0.273	0.298	0.15	0	0	0	0.143	0.163	0.097	0.065	0.196	0.203	0.228	0.03	0.073	0.123
TCGA-BR-8289-01A-11R-2343-13	1.35764	High score	0.025	0.206	0.175	0.112	0.184	0.212	0.109	0.072	0.215	0.328	0.249	0.078	0.007	0.25	0.225	0.09	0.114	0.059	0.146	0.18	0.095	0.059	0.117	0.187
TCGA-F1-6874-01A-11R-1884-13	1.37666	High score	0.008	0.187	0.41	0.176	0.403	0.252	0.233	0.144	0	0.21	0.309	0.053	0	0.166	0.296	0.13	0.133	0.116	0.092	0.121	0.291	0.224	0.184	0.174
TCGA-VQ-AA6K-01A-11R-A414-31	1.50939	High score	0.029	0.172	0.339	0.224	0.337	0.251	0.189	0.135	0.228	0.181	0.316	0.102	0	0.198	0.286	0.123	0.088	0.146	0.063	0.181	0.101	0.19	0.21	0.22
TCGA-IN-AB1X-01A-11R-A39E-31	1.51526	High score	0.053	0.161	0.471	0.289	0.409	0.285	0.255	0.127	0.149	0.122	0.357	0.085	0	0.064	0.2	0.173	0.063	0.148	0.064	0.222	0.14	0.227	0.159	0.255
TCGA-CG-5722-01A-21R-1602-13	1.55034	High score	0.058	0.218	0.474	0.238	0.385	0.373	0.237	0.078	0.34	0.066	0.414	0.072	0	0.168	0.209	0.102	0.163	0.129	0.032	0.234	0.069	0.296	0.191	0.317
TCGA-BR-4368-01A-01R-1157-13	1.59077	High score	0.022	0.167	0.342	0.253	0.375	0.334	0.247	0.11	0.299	0.11	0.336	0.083	0	0.131	0.216	0.15	0.102	0.166	0.087	0.258	0.112	0.255	0.148	0.283
TCGA-RD-A8N1-01A-12R-A36D-31	1.62791	High score	0.073	0.208	0.323	0.243	0.446	0.298	0.283	0.028	0.398	0.145	0.447	0.11	0	0.148	0.262	0.162	0.164	0.143	0.047	0.228	0.043	0.177	0.244	0.278
TCGA-VQ-AA6A-01A-11R-A414-31	1.7746	High score	0.008	0.127	0.163	0.118	0.202	0.23	0.138	0.11	0.132	0.273	0.235	0.091	0	0.173	0.118	0.1	0.053	0.067	0.097	0.113	0.173	0.083	0.105	0.085
TCGA-HU-A4GH-01A-11R-A24K-31	1.85665	High score	0.026	0.178	0.289	0.126	0.196	0.224	0.107	0.128	0.13	0.306	0.203	0.057	0	0.139	0.202	0.103	0.134	0.068	0.098	0.166	0.219	0.097	0.119	0.143
TCGA-VQ-A91A-01A-11R-A414-31	1.89924	High score	0.016	0.138	0.14	0.077	0.269	0.235	0.167	0.117	0.099	0.193	0.179	0.013	0	0.21	0.146	0.129	0.095	0.047	0.209	0.185	0.28	0.079	0.083	0.05
TCGA-HU-A4G9-01A-11R-A24K-31	1.90038	High score	0	0.086	0.18	0.139	0.11	0.193	0.089	0.057	0.154	0.27	0.161	0.099	0	0.01	0	0.066	0.079	0.058	0.062	0.006	0.215	0.128	0.066	0.102
TCGA-HF-A5NB-01A-11R-A31P-31	1.91172	High score	0	0.176	0.314	0.295	0.18	0.286	0.144	0.213	0.076	0.196	0.271	0.029	0	0.065	0.134	0.094	0.037	0.062	0.136	0.061	0.16	0.208	0.025	0.232
TCGA-CG-5718-01A-11R-1602-13	1.93427	High score	0.035	0.126	0.393	0.189	0.283	0.261	0.174	0.12	0.173	0.29	0.242	0.031	0	0.135	0.257	0.169	0.092	0.059	0.101	0.259	0.208	0.21	0.161	0.212
TCGA-CG-4305-01A-01R-1157-13	1.98096	High score	0.054	0.234	0.383	0.235	0.402	0.291	0.242	0.069	0.3	0.111	0.284	0.083	0	0.072	0.214	0.15	0.087	0.132	0.098	0.261	0.124	0.258	0.172	0.263
TCGA-BR-4257-01A-01R-1131-13	2.05588	High score	0.014	0.19	0.425	0.264	0.304	0.322	0.211	0.081	0.105	0.215	0.297	0.022	0	0.098	0.194	0.152	0.095	0.093	0.187	0.191	0.179	0.241	0.111	0.183
TCGA-BR-8486-01A-31R-2402-13	2.17746	High score	0.067	0.158	0.291	0.218	0.386	0.282	0.253	0.13	0.239	0.147	0.391	0.085	0	0.268	0.268	0.119	0.112	0.187	0.075	0.186	0.155	0.136	0.219	0.122
TCGA-HU-A4GJ-01A-11R-A251-31	2.18547	High score	0.078	0.188	0.345	0.322	0.489	0.327	0.33	0.065	0.338	0.087	0.591	0.129	0	0.146	0.179	0.106	0.259	0.076	0.016	0.184	0.015	0.163	0.251	0.291
TCGA-CG-4465-01A-01R-1157-13	2.19116	High score	0.032	0.126	0.296	0.212	0.285	0.265	0.205	0.132	0.074	0.196	0.162	0.068	0	0.176	0.17	0.101	0.102	0.133	0.184	0.15	0.248	0.208	0.109	0.12
TCGA-FP-8099-01A-11R-2343-13	2.33551	High score	0.008	0.104	0.161	0.055	0.241	0.205	0.141	0.109	0.241	0.192	0.196	0.069	0	0.149	0.068	0.179	0.124	0.06	0.16	0.114	0.147	0.086	0.135	0.069
TCGA-BR-8284-01A-11R-2343-13	2.45496	High score	0.067	0.147	0.37	0.249	0.392	0.306	0.245	0.088	0.365	0.076	0.445	0.092	0	0.172	0.269	0.169	0.094	0.144	0.083	0.211	0.071	0.276	0.217	0.27
TCGA-HU-A4H4-01A-21R-A251-31	2.47139	High score	0.044	0.167	0.353	0.313	0.402	0.298	0.254	0.131	0.234	0.12	0.381	0.065	0	0.104	0.244	0.125	0.077	0.074	0.112	0.176	0.145	0.233	0.189	0.251
TCGA-D7-8570-01A-11R-2343-13	2.52187	High score	0.076	0.136	0.387	0.279	0.39	0.322	0.258	0.092	0.245	0.074	0.442	0.088	0	0.145	0.171	0.173	0.096	0.106	0.145	0.195	0.081	0.271	0.217	0.265
TCGA-EQ-8122-01A-11R-2343-13	2.63991	High score	0.003	0.2	0.183	0.075	0.117	0.113	0.076	0.046	0.31	0.24	0.147	0.032	0	0.175	0.173	0.143	0.105	0.108	0.117	0.138	0.204	0.065	0.094	0.077
TCGA-BR-4280-01A-01R-1131-13	2.85005	High score	0.057	0.176	0.383	0.299	0.27	0.299	0.195	0.168	0.133	0.134	0.251	0.092	0	0.153	0.202	0.074	0.071	0.081	0.118	0.105	0.199	0.267	0.109	0.197
TCGA-CG-4442-01A-01R-1157-13	2.86216	High score	0.035	0.122	0.359	0.222	0.22	0.251	0.144	0.131	0.088	0.181	0.289	0.056	0	0.037	0.158	0.114	0.056	0.045	0.132	0.124	0.247	0.224	0.101	0.134
TCGA-HF-7134-01A-11R-2055-13	2.91136	High score	0.023	0.175	0.27	0.098	0.251	0.297	0.137	0.109	0.2	0.153	0.231	0.058	0	0.288	0.18	0.094	0.101	0.056	0.104	0.117	0.253	0.093	0.18	0.085
TCGA-BR-8081-01A-11R-2343-13	2.95283	High score	0.05	0.182	0.392	0.29	0.4	0.314	0.283	0.122	0.214	0.133	0.312	0.055	0	0.279	0.193	0.168	0.164	0.169	0.115	0.22	0.109	0.205	0.165	0.231
TCGA-CD-A4MG-01A-11R-A251-31	2.97725	High score	0.038	0.167	0.212	0.201	0.28	0.242	0.186	0.132	0.126	0.158	0.3	0.099	0	0.132	0.2	0.144	0.117	0.044	0.177	0.13	0.093	0.065	0.107	0.144
TCGA-BR-8361-01A-11R-2343-13	3.0029	High score	0.051	0.158	0.351	0.312	0.318	0.325	0.243	0.138	0.283	0.099	0.328	0.078	0	0.137	0.197	0.082	0.05	0.07	0.091	0.112	0.132	0.274	0.171	0.281
TCGA-BR-A4QL-01A-31R-A251-31	3.00338	High score	0.012	0.179	0.367	0.227	0.178	0.204	0.13	0.119	0.133	0.208	0.277	0.079	0.002	0.099	0.151	0.076	0.077	0.119	0.12	0.078	0.122	0.257	0.028	0.203
TCGA-BR-8676-01A-11R-2402-13	3.01533	High score	0.048	0.12	0.338	0.235	0.214	0.266	0.094	0.071	0.424	0	0.285	0.13	0.014	0.135	0.134	0.17	0.094	0.184	0.115	0.188	0.138	0.26	0.133	0.26
TCGA-BR-8591-01A-11R-2402-13	3.02037	High score	0.04	0.106	0.318	0.21	0.341	0.293	0.24	0.135	0.092	0.204	0.35	0.071	0	0.119	0.156	0.175	0.098	0.105	0.114	0.189	0.144	0.225	0.147	0.175
TCGA-BR-6452-01A-12R-1802-13	3.11947	High score	0.005	0.18	0.44	0.27	0.365	0.338	0.25	0.165	0.232	0.126	0.324	0.035	0	0.099	0.186	0.187	0.047	0.063	0.14	0.233	0.084	0.246	0.131	0.229
TCGA-BR-6802-01A-11R-1884-13	3.12739	High score	0	0.168	0.442	0.282	0.291	0.34	0.189	0.125	0.091	0.09	0.397	0.04	0	0.262	0.226	0.155	0.139	0.127	0.099	0.183	0.129	0.285	0.129	0.265
TCGA-VQ-A94U-01A-12R-A414-31	3.19403	High score	0.012	0.182	0.24	0.083	0.153	0.157	0.09	0	0.172	0.293	0.215	0.099	0	0.141	0.105	0.105	0.119	0.124	0.103	0.137	0.175	0.033	0.086	0.131
TCGA-VQ-A91X-01A-12R-A414-31	3.25662	High score	0.026	0.123	0.221	0.076	0.041	0.041	0.045	0.068	0.152	0.194	0.025	0.092	0	0.228	0.025	0.047	0.093	0.065	0.088	0.095	0.222	0.126	0.071	0.107
TCGA-BR-4371-01A-01R-1157-13	3.27812	High score	0.059	0.175	0.38	0.19	0.219	0.255	0.154	0.064	0.334	0.104	0.347	0.106	0	0.167	0.164	0.134	0.024	0.06	0.109	0.168	0.219	0.165	0.163	0.166
TCGA-RD-A8NB-01A-12R-A39E-31	3.32368	High score	0.067	0.16	0.349	0.258	0.35	0.316	0.228	0.084	0.169	0.168	0.407	0.088	0	0.176	0.227	0.146	0.137	0.141	0.09	0.201	0.126	0.226	0.161	0.25
TCGA-CG-4306-01A-01R-1157-13	3.37568	High score	0	0.184	0.378	0.253	0.336	0.294	0.212	0.141	0.088	0.249	0.335	0.061	0	0.064	0.219	0.126	0.085	0.072	0.136	0.185	0.198	0.211	0.131	0.174
TCGA-CD-8525-01A-11R-2343-13	3.4849	High score	0.026	0.16	0.385	0.282	0.294	0.289	0.185	0.153	0.237	0.265	0.277	0.046	0	0.112	0.261	0.199	0.116	0.126	0.099	0.18	0.101	0.251	0.155	0.23
TCGA-HU-A4GU-01A-11R-A251-31	3.54769	High score	0	0.117	0.302	0.143	0.18	0.214	0.134	0.176	0.163	0.23	0.25	0.097	0	0.211	0.152	0.102	0.012	0.067	0.109	0.162	0.196	0.159	0.084	0.092
TCGA-BR-8679-01A-11R-2402-13	3.60079	High score	0.012	0.131	0.149	0.042	0.074	0.134	0.062	0.032	0.171	0.167	0.103	0.044	0	0.178	0.093	0.13	0.118	0.123	0.134	0.101	0.177	0.101	0.051	0.098
TCGA-BR-7958-01A-21R-2343-13	3.75386	High score	0.031	0.126	0.381	0.297	0.398	0.344	0.268	0.117	0.237	0.044	0.515	0.063	0	0.156	0.232	0.206	0.106	0.152	0.121	0.223	0.059	0.274	0.19	0.28
TCGA-BR-8286-01A-12R-2343-13	3.81915	High score	0.006	0.153	0.29	0.227	0.3	0.332	0.23	0.082	0.305	0.228	0.349	0.061	0	0.12	0.217	0.13	0.075	0.134	0.111	0.212	0.147	0.17	0.117	0.232
TCGA-CD-A487-01A-21R-A24K-31	4.03822	High score	0	0.175	0.289	0.12	0.084	0.055	0.05	0.064	0.171	0.236	0.191	0.031	0	0.283	0.198	0.109	0.101	0.157	0.098	0.175	0.317	0.149	0.029	0.172
TCGA-D7-6526-01A-11R-1802-13	4.36315	High score	0	0.175	0.124	0.095	0.153	0.215	0.132	0.068	0.261	0.226	0	0.026	0	0.264	0.091	0.058	0.207	0.114	0.116	0.113	0.281	0.07	0.068	0.067
TCGA-VQ-A94T-01A-11R-A414-31	4.51646	High score	0	0	0.211	0.024	0.168	0.173	0.089	0.054	0.17	0.332	0.134	0.11	0	0.094	0.009	0.098	0.057	0.042	0.053	0.093	0.208	0.176	0.056	0.078
TCGA-VQ-A925-01A-11R-A414-31	4.52877	High score	0.041	0.225	0.367	0.132	0.204	0.18	0.12	0.015	0.359	0.234	0.26	0.081	0	0.18	0.233	0.112	0.108	0.149	0.066	0.171	0.088	0.116	0.126	0.184
TCGA-VQ-AA6J-01A-11R-A414-31	4.5701	High score	0.096	0.146	0.262	0.234	0.361	0.306	0.257	0.139	0.247	0.11	0.386	0.062	0	0.178	0.269	0.165	0.109	0.089	0.146	0.191	0.146	0.156	0.226	0.185
TCGA-HU-A4GT-01A-21R-A251-31	4.7531	High score	0.036	0.219	0.256	0.232	0.224	0.246	0.15	0.156	0.137	0.232	0.26	0.067	0	0.151	0.182	0.094	0.116	0.109	0.135	0.118	0.193	0.137	0.096	0.137
TCGA-FP-8631-01A-11R-2402-13	4.80191	High score	0.02	0.152	0.189	0.1	0.22	0.18	0.121	0.125	0.074	0.221	0.235	0.068	0	0.131	0.125	0.138	0.126	0.136	0.085	0.197	0.221	0.037	0.098	0.103
TCGA-BR-7197-01A-11R-2203-13	4.89382	High score	0	0.091	0.157	0.054	0.09	0.143	0.096	0	0.219	0.338	0.091	0.053	0	0.187	0.078	0.116	0.104	0.088	0.118	0.156	0.103	0.099	0.035	0.221
TCGA-VQ-A8DU-01A-11R-A36D-31	4.97746	High score	0.062	0.156	0.342	0.144	0.269	0.226	0.179	0.085	0.232	0.135	0.307	0.064	0	0.203	0.242	0.106	0.136	0.163	0.057	0.212	0.156	0.171	0.144	0.211
TCGA-F1-6875-01A-11R-2055-13	5.09834	High score	0	0.102	0.303	0.145	0.161	0.222	0.142	0.179	0.117	0.201	0.027	0.025	0	0.089	0.221	0.033	0.072	0.001	0.09	0	0.154	0.074	0.028	0.213
TCGA-IN-A7NT-01A-21R-A354-31	5.11601	High score	0	0.114	0.125	0.161	0.208	0.157	0.15	0.206	0.302	0.149	0	0	0	0.153	0.005	0.195	0.148	0.084	0.122	0.147	0.185	0.153	0	0.079
TCGA-IN-A6RI-01A-11R-A32D-31	5.17371	High score	0	0.172	0.151	0.072	0.115	0.212	0.101	0.184	0.108	0.292	0.161	0.023	0	0.079	0.028	0.113	0.132	0.103	0.131	0.057	0.199	0.016	0.028	0.055
TCGA-CD-8531-01A-11R-2343-13	5.24956	High score	0.09	0.107	0.109	0.088	0.022	0.25	0.078	0.132	0.285	0.095	0.175	0.058	0	0.243	0.104	0.054	0.288	0.038	0.16	0.085	0.12	0.093	0.149	0.159
TCGA-VQ-A8PK-01A-12R-A414-31	5.31343	High score	0	0.118	0.379	0.207	0.244	0.214	0.123	0.126	0.136	0.301	0.182	0.033	0	0.003	0.172	0.134	0.064	0.063	0.093	0.177	0.215	0.243	0.087	0.099
TCGA-R5-A7O7-01A-11R-A33Y-31	5.33122	High score	0.091	0.124	0.25	0.205	0.38	0.308	0.237	0.183	0.262	0.16	0.369	0.11	0	0.196	0.339	0.115	0.118	0.111	0.068	0.205	0.127	0.109	0.292	0.12
TCGA-VQ-A8PF-01A-11R-A414-31	5.4207	High score	0.058	0.161	0.396	0.282	0.435	0.305	0.248	0.065	0.222	0.054	0.466	0.099	0	0.125	0.253	0.181	0.075	0.096	0.098	0.231	0.102	0.228	0.197	0.281
TCGA-HU-8244-01A-11R-2343-13	5.42189	High score	0	0.177	0.309	0.12	0.106	0.172	0.095	0.052	0.178	0.273	0.064	0.075	0	0.19	0.103	0.061	0.037	0.098	0.107	0.032	0.213	0.094	0.042	0.14
TCGA-HU-A4HD-01A-11R-A251-31	5.491	High score	0.014	0.223	0.264	0.158	0.241	0.254	0.174	0.153	0.334	0.235	0.227	0.059	0	0.199	0.231	0.113	0.042	0.1	0.113	0.129	0.185	0.039	0.08	0.135
TCGA-BR-6565-01A-11R-1802-13	5.60943	High score	0.049	0.203	0.322	0.264	0.357	0.311	0.256	0.09	0.196	0.068	0.249	0.085	0	0.231	0.264	0.116	0.119	0.128	0.135	0.147	0.095	0.222	0.158	0.229
TCGA-BR-8381-01A-11R-2402-13	5.64932	High score	0.072	0.177	0.377	0.285	0.417	0.329	0.274	0.087	0.328	0.064	0.513	0.094	0	0.055	0.248	0.19	0.067	0.093	0.082	0.26	0.056	0.218	0.193	0.302
TCGA-D7-8572-01A-11R-2343-13	5.65849	High score	0.062	0.147	0.381	0.243	0.39	0.268	0.257	0.123	0.265	0.119	0.352	0.065	0	0.12	0.178	0.164	0.087	0.162	0.106	0.252	0.141	0.158	0.155	0.215
TCGA-BR-8372-01A-11R-2343-13	5.67947	High score	0.016	0.137	0.417	0.268	0.33	0.361	0.235	0.13	0.301	0.049	0.391	0.071	0	0.174	0.145	0.144	0.081	0.118	0.146	0.241	0.137	0.315	0.124	0.257
TCGA-KB-A93H-01A-11R-A39E-31	5.69332	High score	0.075	0.165	0.247	0.136	0.071	0.129	0.048	0.14	0.163	0.174	0.316	0.102	0.016	0.091	0.229	0.071	0.035	0.025	0.122	0.059	0.167	0.126	0.15	0.184
TCGA-HU-8604-01A-11R-2402-13	5.85313	High score	0.034	0.163	0.458	0.283	0.358	0.329	0.229	0.197	0.101	0.108	0.387	0.081	0	0.113	0.244	0.115	0.05	0.092	0.134	0.179	0.129	0.298	0.199	0.227
TCGA-CG-5726-01A-11R-1602-13	5.8967	High score	0	0.109	0.271	0.131	0.082	0.235	0.075	0.091	0.123	0.215	0.187	0.033	0	0.101	0.059	0.164	0.07	0.076	0.125	0.149	0.161	0.149	0	0.158
TCGA-BR-7707-01A-11R-2055-13	5.91404	High score	0	0.082	0.412	0.286	0.263	0.339	0.162	0.18	0.117	0.194	0.232	0.026	0	0.091	0.192	0.138	0.035	0.063	0.119	0.132	0.151	0.302	0.05	0.211
TCGA-HU-A4H8-01A-11R-A251-31	6.03283	High score	0	0.164	0.304	0.216	0.243	0.308	0.168	0.166	0.066	0.28	0.246	0.068	0	0.079	0.105	0.106	0.135	0.105	0.117	0.084	0.13	0.139	0.02	0.15
TCGA-IP-7968-01A-11R-2203-13	6.19879	High score	0.03	0.223	0.349	0.267	0.31	0.301	0.221	0.086	0.161	0.126	0.353	0.046	0	0.143	0.255	0.159	0.079	0.086	0.075	0.183	0.132	0.207	0.094	0.263
TCGA-VQ-A94R-01A-11R-A414-31	6.43433	High score	0.083	0.141	0.266	0.21	0.305	0.28	0.202	0.095	0.168	0.149	0.328	0.107	0.018	0.119	0.249	0.127	0.101	0.103	0.093	0.197	0.108	0.123	0.171	0.214
TCGA-FP-7829-01A-11R-2055-13	6.45538	High score	0	0.112	0	0	0.162	0.222	0.098	0.056	0.267	0.16	0.104	0.005	0	0.156	0.007	0.146	0.085	0.073	0.229	0.156	0.208	0.031	0.05	0
TCGA-HU-8249-01A-11R-A36D-31	6.55147	High score	0.061	0.105	0.521	0.24	0.343	0.263	0.239	0.178	0.103	0.069	0.264	0.075	0	0.185	0.276	0.107	0.039	0.12	0.057	0.198	0.156	0.288	0.171	0.18
TCGA-RD-A7C1-01A-11R-A32D-31	7.04005	High score	0	0.189	0.517	0.231	0.361	0.309	0.204	0.119	0.154	0.197	0.402	0.017	0	0.218	0.235	0.186	0.139	0.158	0.135	0.266	0.231	0.261	0.132	0.277
TCGA-RD-A7BT-01A-11R-A33Y-31	7.13886	High score	0.06	0.201	0.246	0.257	0.227	0.192	0.131	0.152	0.217	0.131	0.225	0.096	0	0.172	0.186	0	0.072	0.118	0.09	0.11	0.213	0.155	0.111	0.168
TCGA-3M-AB46-01A-11R-A414-31	7.17436	High score	0	0.226	0.206	0.113	0.166	0.211	0.129	0.035	0.313	0.264	0.246	0.061	0	0.065	0.108	0.075	0.056	0.106	0.106	0.12	0.166	0.105	0.072	0.156
TCGA-BR-8368-01A-11R-2343-13	7.21783	High score	0.076	0.169	0.333	0.249	0.235	0.289	0.187	0.118	0.165	0.187	0.391	0.084	0	0.208	0.238	0.095	0.112	0.136	0.081	0.167	0.146	0.218	0.159	0.227
TCGA-BR-6707-01A-11R-1884-13	7.39852	High score	0.041	0.143	0.407	0.271	0.253	0.353	0.188	0.096	0.458	0.014	0.495	0.085	0	0.106	0.214	0.201	0.102	0.094	0.132	0.178	0.03	0.287	0.141	0.283
TCGA-BR-7851-01A-11R-2203-13	7.47525	High score	0.018	0.221	0.307	0.236	0.338	0.25	0.227	0.13	0.08	0.128	0.201	0.065	0	0.271	0.256	0.084	0.125	0.141	0.117	0.16	0.163	0.197	0.16	0.211
TCGA-FP-A9TM-01A-11R-A39E-31	7.5888	High score	0.105	0.205	0.198	0.27	0.343	0.342	0.253	0.064	0.134	0.109	0.414	0.098	0	0.236	0.154	0.068	0.298	0.082	0.05	0.134	0.179	0.042	0.213	0.176
TCGA-CG-4460-01A-01R-1157-13	7.76404	High score	0.042	0.17	0.305	0.232	0.27	0.258	0.173	0.127	0.366	0.168	0.259	0.056	0.006	0.087	0.182	0.161	0.073	0.078	0.094	0.193	0.156	0.182	0.076	0.216
TCGA-BR-8485-01A-11R-2402-13	7.81462	High score	0.034	0.235	0.384	0.238	0.408	0.272	0.261	0.068	0.336	0.148	0.347	0.074	0	0.155	0.275	0.118	0.053	0.185	0.06	0.236	0.122	0.223	0.191	0.228
TCGA-CD-8528-01A-11R-2343-13	8.02592	High score	0	0.15	0.159	0.138	0.189	0.219	0.132	0.098	0.126	0.196	0.056	0.023	0	0.072	0.019	0.078	0.065	0.045	0.148	0.105	0.264	0.165	0.042	0.07
TCGA-VQ-A91S-01A-11R-A414-31	8.14695	High score	0.028	0.23	0.327	0.28	0.321	0.306	0.192	0.129	0.246	0.061	0.227	0.08	0	0.162	0.254	0.071	0.045	0.115	0.096	0.122	0.205	0.254	0.111	0.24
TCGA-VQ-A91Z-01A-11R-A414-31	8.15021	High score	0	0.044	0.165	0.107	0.204	0.201	0.167	0.148	0.203	0.281	0.094	0.056	0	0.108	0.075	0.075	0.02	0.034	0.036	0.046	0.187	0.102	0.043	0.167
TCGA-CG-5725-01A-11R-1602-13	8.27829	High score	0	0.204	0.199	0.194	0.196	0.209	0.112	0.093	0.258	0.126	0.089	0.036	0	0.148	0.242	0.113	0.102	0.072	0.075	0.186	0.115	0.14	0	0.187
TCGA-BR-4369-01A-01R-1157-13	8.30569	High score	0.071	0.235	0.322	0.187	0.375	0.242	0.254	0.078	0.321	0.102	0.398	0.064	0	0.245	0.212	0.097	0.117	0.244	0.057	0.284	0.212	0.087	0.209	0.212
TCGA-D7-8573-01A-11R-2343-13	8.33386	High score	0.044	0.135	0.224	0.182	0.256	0.236	0.137	0.118	0.146	0.122	0.229	0.096	0.003	0.142	0.165	0.094	0.072	0.083	0.097	0.158	0.215	0.165	0.07	0.146
TCGA-HU-A4GF-01A-11R-A24K-31	8.36171	High score	0	0.245	0.407	0.196	0.328	0.271	0.227	0.114	0.208	0.101	0.197	0.031	0	0.205	0.237	0.081	0.1	0.127	0.083	0.193	0.25	0.133	0.128	0.142
TCGA-VQ-A923-01A-11R-A414-31	8.40398	High score	0.07	0.164	0.377	0.257	0.437	0.291	0.283	0.063	0.251	0.067	0.505	0.112	0	0.126	0.255	0.151	0.109	0.132	0.049	0.239	0.082	0.254	0.226	0.298
TCGA-CG-4444-01A-01R-1157-13	8.45078	High score	0.013	0.154	0.296	0.249	0.38	0.273	0.254	0.087	0.178	0.21	0.301	0.081	0	0.208	0.256	0.121	0.154	0.159	0.106	0.176	0.163	0.133	0.172	0.166
TCGA-VQ-A924-01A-11R-A414-31	8.46142	High score	0	0.22	0.359	0.275	0.289	0.326	0.208	0.139	0.07	0.096	0.324	0.062	0	0.149	0.208	0.124	0.06	0.098	0.125	0.153	0.129	0.261	0.072	0.244
TCGA-D7-A6EZ-01A-11R-A31P-31	8.47877	High score	0.028	0.121	0.41	0.267	0.301	0.306	0.218	0.22	0.213	0.05	0.197	0.078	0	0.123	0.236	0.092	0.06	0.076	0.136	0.178	0.123	0.327	0.123	0.277
TCGA-CG-4469-01A-01R-1157-13	8.57526	High score	0.017	0.169	0.142	0.114	0.29	0.26	0.211	0.148	0.187	0.172	0.217	0.052	0	0.114	0.141	0.127	0.066	0.077	0.162	0.198	0.274	0.085	0.151	0.092
TCGA-BR-6455-01A-11R-1802-13	8.61196	High score	0.026	0.157	0.299	0.242	0.303	0.306	0.214	0.091	0.223	0.075	0.344	0.076	0	0.224	0.256	0.121	0.121	0.117	0.109	0.199	0.135	0.231	0.151	0.283
TCGA-BR-7715-01A-11R-2055-13	8.68184	High score	0.004	0.096	0.18	0.153	0.232	0.246	0.161	0.119	0.247	0.288	0.202	0.052	0	0.221	0.185	0.097	0.087	0.109	0.099	0.129	0.108	0.118	0.087	0.133
TCGA-VQ-A91E-01A-31R-A414-31	8.95872	High score	0.027	0.173	0.429	0.28	0.271	0.297	0.181	0.151	0.239	0.185	0.32	0.102	0	0.111	0.201	0.146	0.103	0.058	0.075	0.16	0.139	0.229	0.158	0.259
TCGA-D7-A4YX-01A-11R-A251-31	9.09064	High score	0.021	0.164	0.391	0.263	0.299	0.323	0.201	0.116	0.136	0.063	0.363	0.084	0	0.127	0.234	0.15	0.054	0.095	0.103	0.185	0.134	0.278	0.117	0.268
TCGA-BR-4363-01A-01R-1157-13	9.35045	High score	0.073	0.201	0.379	0.247	0.37	0.268	0.221	0.103	0.24	0.103	0.355	0.09	0	0.057	0.234	0.108	0.065	0.078	0.103	0.229	0.188	0.233	0.19	0.237
TCGA-VQ-A8E2-01A-11R-A36D-31	9.35703	High score	0.043	0.165	0.347	0.225	0.342	0.245	0.23	0.114	0.195	0.178	0.314	0.043	0	0.142	0.27	0.124	0.094	0.186	0.044	0.251	0.14	0.182	0.141	0.173
TCGA-BR-8589-01A-11R-2402-13	9.41531	High score	0.021	0.139	0.436	0.267	0.352	0.32	0.247	0.085	0.265	0.115	0.506	0.114	0	0.134	0.171	0.181	0.033	0.127	0.128	0.175	0.128	0.294	0.124	0.289
TCGA-BR-A4PF-01A-11R-A251-31	9.72077	High score	0.076	0.198	0.321	0.256	0.302	0.285	0.173	0.16	0.113	0.059	0.277	0.068	0	0.189	0.204	0.099	0.058	0.084	0.164	0.128	0.298	0.209	0.164	0.154
TCGA-D7-A4YU-01A-21R-A251-31	10.1436	High score	0.09	0.152	0.338	0.312	0.428	0.304	0.297	0.094	0.233	0.053	0.352	0.126	0	0.158	0.232	0.112	0.141	0.144	0.063	0.226	0.088	0.233	0.221	0.286
TCGA-F1-6177-01A-11R-1802-13	10.1743	High score	0.022	0.148	0.25	0.18	0.222	0.234	0.16	0.099	0.153	0.113	0.225	0.082	0	0.181	0.133	0.092	0.071	0.044	0.124	0.04	0.196	0.193	0.088	0.14
TCGA-D7-A6EV-01A-11R-A31P-31	10.2369	High score	0.027	0.13	0.152	0.148	0.228	0.279	0.155	0.119	0.078	0.2	0.248	0.081	0	0.222	0.163	0.096	0.096	0.057	0.11	0.087	0.22	0.086	0.061	0.089
TCGA-CG-4477-01A-01R-1157-13	10.2822	High score	0.012	0.165	0.386	0.242	0.469	0.274	0.252	0.111	0.259	0.092	0.345	0.076	0	0.126	0.232	0.145	0.135	0.206	0.085	0.232	0.265	0.238	0.218	0.248
TCGA-HF-7133-01A-11R-2055-13	10.3758	High score	0.066	0.14	0.4	0.239	0.329	0.337	0.215	0.103	0.088	0.208	0.317	0.067	0	0.212	0.227	0.172	0.103	0.123	0.114	0.211	0.161	0.188	0.216	0.174
TCGA-D7-6822-01A-11R-1884-13	10.538	High score	0	0.157	0.353	0.16	0.267	0.207	0.179	0.057	0.34	0.188	0.187	0.032	0	0.105	0.148	0.146	0.069	0.064	0.126	0.174	0.207	0.176	0.032	0.158
TCGA-CD-5800-01A-11R-1602-13	10.7118	High score	0.034	0.182	0.308	0.116	0.167	0.216	0.134	0.138	0.274	0.167	0.179	0.018	0	0.231	0.202	0.125	0.168	0.167	0.127	0.202	0.112	0.101	0.062	0.187
TCGA-BR-8680-01A-11R-2402-13	10.7349	High score	0	0.203	0.195	0.157	0.083	0.023	0.063	0.083	0.182	0.2	0.163	0.085	0	0.155	0.146	0.076	0.092	0.013	0.071	0.086	0.145	0.126	0.022	0.135
TCGA-VQ-A8PO-01A-11R-A414-31	10.8081	High score	0.02	0.224	0.339	0.304	0.348	0.354	0.24	0.119	0.147	0.067	0.394	0.065	0	0.155	0.218	0.14	0.119	0.09	0.131	0.139	0.11	0.24	0.111	0.25
TCGA-BR-A4CR-01A-11R-A24K-31	10.8593	High score	0	0.143	0.182	0.06	0.234	0.161	0.15	0.056	0.125	0.188	0.093	0.073	0	0.023	0	0.108	0.042	0.061	0.082	0.146	0.219	0.131	0.043	0.078
TCGA-CG-4440-01A-01R-1157-13	10.8898	High score	0	0.16	0.301	0.14	0.135	0.172	0.126	0.103	0.148	0.192	0.028	0.04	0.001	0.076	0.12	0.104	0.033	0.072	0.139	0.105	0.276	0.179	0.071	0.123
TCGA-VQ-A8P2-01A-11R-A36D-31	11.567	High score	0	0.148	0.178	0.131	0.094	0.18	0.087	0.132	0.297	0.228	0.222	0.047	0	0.14	0.106	0.103	0.123	0.092	0.094	0.081	0.144	0.151	0	0.128
TCGA-R5-A7ZF-01A-11R-A354-31	11.6036	High score	0	0.086	0.307	0.198	0.134	0.063	0.093	0.153	0.101	0.169	0.161	0.057	0	0.089	0.104	0.078	0.077	0.043	0.028	0.087	0.201	0.249	0.021	0.166
TCGA-CD-A4MH-01A-11R-A251-31	11.8906	High score	0.044	0.247	0.312	0.217	0.233	0.215	0.149	0.113	0.241	0.233	0.291	0.045	0	0.176	0.187	0.026	0.117	0.262	0.086	0.202	0.251	0.069	0.15	0.214
TCGA-VQ-A922-01A-11R-A414-31	11.9316	High score	0.041	0.141	0.231	0.143	0.233	0.208	0.181	0.089	0.311	0.198	0.201	0.059	0	0.141	0.224	0.146	0.106	0.118	0.08	0.177	0.147	0.045	0.07	0.114
TCGA-CD-8526-01A-11R-2343-13	12.0919	High score	0.057	0.152	0.265	0.263	0.316	0.278	0.227	0.141	0.413	0.103	0.387	0.075	0	0.191	0.271	0.134	0.114	0.104	0.067	0.191	0.121	0.184	0.164	0.226
TCGA-KB-A6F7-01A-12R-A32D-31	12.1097	High score	0.037	0.123	0.451	0.258	0.38	0.326	0.235	0.19	0.214	0.081	0.366	0.042	0	0.072	0.189	0.201	0.048	0.123	0.127	0.165	0.118	0.244	0.1	0.253
TCGA-VQ-A8E3-01A-11R-A39E-31	12.1341	High score	0.019	0.184	0.492	0.292	0.319	0.267	0.188	0.072	0.138	0.183	0.401	0.082	0	0.134	0.202	0.111	0.054	0.105	0.072	0.245	0.163	0.305	0.127	0.299
TCGA-VQ-A91N-01A-11R-A414-31	12.3641	High score	0.048	0.206	0.231	0.179	0.279	0.211	0.135	0.105	0.263	0.153	0.323	0.103	0	0.184	0.233	0.093	0.098	0.081	0.071	0.157	0.142	0.145	0.11	0.172
TCGA-D7-6528-01A-11R-1802-13	12.4769	High score	0	0.063	0.229	0.022	0.112	0.179	0.085	0.096	0.192	0.157	0.147	0.066	0	0.236	0.084	0.121	0.06	0.042	0.115	0.033	0.186	0.209	0.088	0.087
TCGA-CD-8535-01A-11R-2343-13	12.7717	High score	0	0.089	0.106	0.118	0.186	0.289	0.089	0.112	0.334	0.172	0.06	0.023	0	0.14	0.136	0.146	0.092	0.063	0.086	0.169	0.15	0.132	0.012	0.135
TCGA-VQ-A8P5-01A-11R-A39E-31	12.8975	High score	0.029	0.162	0.367	0.243	0.275	0.234	0.193	0.128	0.254	0.16	0.198	0.055	0	0.128	0.227	0.125	0.097	0.081	0.119	0.173	0.127	0.247	0.113	0.215
TCGA-VQ-A8PE-01A-11R-A414-31	12.9096	High score	0.069	0.17	0.332	0.248	0.351	0.283	0.247	0.135	0.245	0.087	0.228	0.061	0	0.238	0.205	0.072	0.137	0.148	0.075	0.206	0.142	0.153	0.159	0.186
TCGA-CG-4436-01A-01R-1157-13	12.9625	High score	0.058	0.107	0.29	0.181	0.239	0.212	0.119	0.172	0.08	0.175	0.176	0.062	0	0.245	0.233	0.037	0.105	0.142	0.165	0.102	0.338	0.166	0.113	0.082
TCGA-HU-8608-01A-11R-2402-13	13.126	High score	0.044	0.154	0.397	0.307	0.483	0.347	0.317	0.071	0.267	0.057	0.387	0.089	0	0.186	0.239	0.148	0.06	0.063	0.079	0.214	0.167	0.241	0.206	0.258
TCGA-VQ-A8PH-01A-12R-A414-31	13.8901	High score	0.104	0.194	0.357	0.264	0.26	0.269	0.159	0.132	0.314	0.115	0.369	0.119	0	0.102	0.291	0.036	0.082	0.107	0.056	0.162	0.124	0.178	0.196	0.207
TCGA-HU-A4GD-01A-11R-A36D-31	13.9907	High score	0	0.373	0.356	0.196	0.289	0.122	0.142	0.073	0.168	0.142	0.328	0.097	0	0.154	0.244	0.138	0.17	0.139	0.044	0.259	0.235	0.12	0.205	0.234
TCGA-BR-8295-01A-11R-2343-13	14.361	High score	0.029	0.108	0.241	0.111	0.069	0.06	0.021	0.152	0.397	0.146	0.181	0.066	0	0.121	0.164	0.132	0.128	0.113	0.063	0.135	0.172	0.077	0.068	0.191
TCGA-HU-A4H2-01A-11R-A251-31	14.5413	High score	0.01	0.191	0.305	0.229	0.302	0.308	0.198	0.177	0.321	0.205	0.289	0.076	0	0.176	0.197	0.123	0.111	0.068	0.118	0.171	0.071	0.17	0.187	0.187
TCGA-BR-4357-01A-01R-1157-13	14.6693	High score	0.09	0.188	0.426	0.231	0.341	0.262	0.219	0.143	0.209	0.192	0.317	0.045	0	0.031	0.269	0.192	0.048	0.13	0.134	0.208	0.149	0.244	0.216	0.2
TCGA-BR-8060-01A-11R-2343-13	15.2482	High score	0.006	0.195	0.316	0.198	0.38	0.279	0.212	0.098	0.165	0.101	0.275	0.041	0	0.202	0.226	0.187	0.099	0.199	0.099	0.212	0.12	0.211	0.168	0.161
TCGA-VQ-A94O-01A-11R-A414-31	15.2524	High score	0.071	0.144	0.316	0.2	0.313	0.244	0.227	0.128	0.151	0.139	0.349	0.099	0	0.265	0.301	0.04	0.046	0.141	0.06	0.192	0.202	0.192	0.153	0.198
TCGA-VQ-A8PB-01A-11R-A39E-31	15.441	High score	0.026	0.193	0.363	0.231	0.266	0.247	0.182	0.111	0.168	0.151	0.19	0.069	0	0.035	0.204	0.111	0.047	0.081	0.118	0.154	0.17	0.254	0.078	0.222
TCGA-BR-4253-01A-01R-1131-13	15.5861	High score	0.034	0.158	0.439	0.294	0.419	0.346	0.263	0.149	0.374	0.034	0.363	0.097	0	0.141	0.171	0.122	0.046	0.099	0.126	0.196	0.184	0.311	0.193	0.25
TCGA-HU-A4G8-01A-11R-A251-31	15.7868	High score	0.077	0.158	0.358	0.276	0.343	0.293	0.221	0.141	0.123	0.095	0.398	0.081	0	0.062	0.252	0.157	0.132	0.044	0.094	0.175	0.1	0.211	0.16	0.233
TCGA-BR-4361-01A-01R-1157-13	15.9481	High score	0.035	0.153	0.361	0.277	0.38	0.323	0.245	0.12	0.321	0.097	0.389	0.106	0	0.188	0.245	0.134	0.075	0.14	0.098	0.195	0.146	0.241	0.2	0.212
TCGA-CD-8533-01A-11R-2343-13	17.0835	High score	0	0.213	0.216	0.038	0.13	0.164	0.147	0.027	0.147	0.188	0.15	0.048	0	0.115	0.086	0.131	0.069	0.105	0.067	0.193	0.157	0.132	0.056	0.208
TCGA-CG-4466-01A-01R-1157-13	17.636	High score	0	0.155	0.246	0.078	0.224	0.201	0.125	0.126	0.248	0.152	0.299	0.093	0.008	0.132	0.147	0.096	0.033	0.043	0.055	0.138	0.26	0.203	0.135	0.058
TCGA-BR-8678-01A-11R-2402-13	17.8978	High score	0.009	0.074	0.266	0.17	0.254	0.278	0.135	0.133	0.243	0.138	0.19	0.064	0	0.118	0.21	0.128	0.122	0.108	0.098	0.131	0.133	0.223	0.036	0.174
TCGA-BR-7723-01A-11R-2055-13	17.9063	High score	0.097	0.174	0.219	0.216	0.367	0.257	0.265	0.117	0.286	0.096	0.229	0.144	0	0.154	0.242	0.079	0.096	0.13	0.128	0.176	0.072	0.143	0.174	0.234
TCGA-MX-A666-01A-11R-A31P-31	17.9709	High score	0.104	0.211	0.281	0.224	0.326	0.259	0.252	0.169	0.213	0.134	0.306	0.106	0	0.145	0.197	0.05	0.224	0.104	0	0.179	0.132	0	0.186	0.153
TCGA-HU-8602-01A-11R-2402-13	18.2084	High score	0.005	0.114	0.369	0.277	0.369	0.364	0.216	0.2	0.017	0.062	0.225	0.078	0	0.11	0.201	0.085	0.019	0.059	0.166	0.11	0.217	0.295	0.129	0.155
TCGA-IN-A6RO-01A-12R-A33Y-31	18.2843	High score	0	0.207	0.218	0.153	0.175	0.206	0.096	0.149	0.182	0.134	0.155	0.058	0	0.126	0.101	0.108	0.083	0.051	0.103	0.086	0.127	0.22	0.066	0.134
TCGA-HU-A4H0-01A-11R-A251-31	19.2416	High score	0.056	0.148	0.356	0.333	0.284	0.292	0.191	0.119	0.237	0.104	0.364	0.13	0	0.152	0.242	0.112	0.073	0.128	0.101	0.129	0.076	0.279	0.161	0.234
TCGA-VQ-AA6D-01A-11R-A414-31	20.1052	High score	0.025	0.154	0.226	0.161	0.156	0.169	0.118	0.238	0.23	0.252	0.149	0.024	0	0.167	0.121	0.082	0.044	0.018	0.106	0.086	0.24	0.1	0.07	0.098
TCGA-D7-A6F0-01A-11R-A31P-31	24.0398	High score	0.066	0.149	0.409	0.192	0.226	0.277	0.17	0.218	0.23	0.084	0.303	0.041	0	0.038	0.146	0.179	0.034	0.235	0.13	0.228	0.067	0.241	0.048	0.264
TCGA-VQ-AA69-01A-11R-A414-31	28.1891	High score	0	0.168	0.344	0.271	0.242	0.263	0.16	0.122	0.358	0.143	0.307	0.055	0	0.007	0.126	0.126	0.022	0.085	0.12	0.132	0.113	0.289	0.007	0.232
